# Supplementary material for: Brief assessment of male depression in clinical care: Validation of the Male Depression Risk Scale short form in a cross-sectional study of Australian men
Source: PubMed Central journal article supplement — BMJ Open. 2022 Mar 28;12(3):e053650. doi: 10.1136/bmjopen-2021-053650 (PMC8961138; doi:10.1136/bmjopen-2021-053650), 2022-03-28
Supplement: bmjopen-2021-053650.draft_revisions.pdf [file bmjopen-2021-053650.draft_revisions.pdf]

# BMJ Open

BMJ Open is committed to open peer review. As part of this commitment we make the peer review history of every article we publish publicly available.

When an article is published we post the peer reviewers' comments and the authors' responses online. We also post the versions of the paper that were used during peer review. These are the versions that the peer review comments apply to.

The versions of the paper that follow are the versions that were submitted during the peer review process. They are not the versions of record or the final published versions. They should not be cited or distributed as the published version of this manuscript.

BMJ Open is an open access journal and the full, final, typeset and author-corrected version of record of the manuscript is available on our site with no access controls, subscription charges or pay-per-view fees (<http://bmjopen.bmj.com>).

If you have any questions on BMJ Open's open peer review process please email [info.bmjopen@bmj.com](mailto:info.bmjopen@bmj.com)

# BMJ Open

## Brief assessment of male depression in clinical care: Validation of the Male Depression Risk Scale Short Form in a cross-sectional study of Australian men

|                               |                                                                                                                                                                                                                                                                                                                                                             |
|-------------------------------|-------------------------------------------------------------------------------------------------------------------------------------------------------------------------------------------------------------------------------------------------------------------------------------------------------------------------------------------------------------|
| Journal:                      | <i>BMJ Open</i>                                                                                                                                                                                                                                                                                                                                             |
| Manuscript ID                 | bmjopen-2021-053650                                                                                                                                                                                                                                                                                                                                         |
| Article Type:                 | Original research                                                                                                                                                                                                                                                                                                                                           |
| Date Submitted by the Author: | 23-May-2021                                                                                                                                                                                                                                                                                                                                                 |
| Complete List of Authors:     | Herreen, Danielle; The University of Adelaide School of Psychology, ; Commonwealth Scientific and Industrial Research Organisation, Health & Biosecurity<br>Rice, Simon; Orygen Youth Health; The University of Melbourne Centre for Youth Mental Health<br>Zajac, Ian ; Commonwealth Scientific and Industrial Research Organisation, Health & Biosecurity |
| Keywords:                     | Depression & mood disorders < PSYCHIATRY, PRIMARY CARE, Suicide & self-harm < PSYCHIATRY, Adult psychiatry < PSYCHIATRY                                                                                                                                                                                                                                     |
|                               |                                                                                                                                                                                                                                                                                                                                                             |

SCHOLARONE™  
Manuscripts

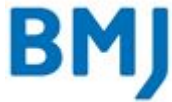

I, the Submitting Author has the right to grant and does grant on behalf of all authors of the Work (as defined in the below author licence), an exclusive licence and/or a non-exclusive licence for contributions from authors who are: i) UK Crown employees; ii) where BMJ has agreed a CC-BY licence shall apply, and/or iii) in accordance with the terms applicable for US Federal Government officers or employees acting as part of their official duties; on a worldwide, perpetual, irrevocable, royalty-free basis to BMJ Publishing Group Ltd ("BMJ") its licensees and where the relevant Journal is co-owned by BMJ to the co-owners of the Journal, to publish the Work in this journal and any other BMJ products and to exploit all rights, as set out in our [licence](#).

The Submitting Author accepts and understands that any supply made under these terms is made by BMJ to the Submitting Author unless you are acting as an employee on behalf of your employer or a postgraduate student of an affiliated institution which is paying any applicable article publishing charge ("APC") for Open Access articles. Where the Submitting Author wishes to make the Work available on an Open Access basis (and intends to pay the relevant APC), the terms of reuse of such Open Access shall be governed by a Creative Commons licence – details of these licences and which [Creative Commons](#) licence will apply to this Work are set out in our licence referred to above.

Other than as permitted in any relevant BMJ Author's Self Archiving Policies, I confirm this Work has not been accepted for publication elsewhere, is not being considered for publication elsewhere and does not duplicate material already published. I confirm all authors consent to publication of this Work and authorise the granting of this licence.

1  
2  
3  
4 1 **Brief assessment of male depression in clinical care:**  
5 2 **Validation of the Male Depression Risk Scale Short Form in a cross-sectional study of**  
6  
7 3 **Australian men**  
8  
9 4  
10 5  
11 6

12 Danielle Herreen<sup>1,2\*</sup>, Simon Rice<sup>3,4</sup>, & Ian Zajac<sup>2</sup>  
13  
14 7

15  
16 8 <sup>1</sup> School of Psychology, University of Adelaide, Adelaide, SA 5000 Australia  
17

18 9 <sup>2</sup> Health & Biosecurity, Commonwealth Scientific & Industrial Research Organisation  
19  
20 10 (CSIRO), Adelaide, SA 5000, Australia

21 11 <sup>3</sup> Orygen, Parkville, VIC 3052, Australia  
22

23 12 <sup>4</sup> Centre for Youth Mental Health, The University of Melbourne, Melbourne, VIC 3052,  
24  
25 13 Australia  
26

27 14  
28  
29 15 \* Corresponding author information: Danielle Herreen, School of Psychology, University of  
30  
31 16 Adelaide, Adelaide, SA 5000, Australia (email: [danielle.herreen@adelaide.edu.au](mailto:danielle.herreen@adelaide.edu.au))  
32  
33 17

34 18  
35 19  
36 20  
37 21  
38 20 **Word Count: 3670**  
39  
40 21  
41 22  
42 23  
43 24  
44 25  
45 26  
46 27  
47 28  
48 29  
49 30  
50  
51  
52  
53  
54  
55  
56  
57  
58  
59  
60

## Abstract

**Objectives:** To develop and validate a short form of the Male Depression Risk Scale (MDRS-22) for use in primary care, examining sensitivity indices for psychological distress and suicidality.

**Design:** Cross-sectional study with 8-month follow-up.

**Setting:** Community-based recruited via an online survey.

**Participants:** A community sample of younger ( $n = 514$ ; 18-64 years) and older ( $n = 444$ ; 65-93 years) males residing in Australia ( $M$  age = 58.11 years,  $SD = 17.73$ ) completed measures of externalising and prototypic depression symptoms. A subset of respondents ( $n = 167$  younger males;  $n = 173$  older males) provided follow-up data approximately eight months later.

**Primary and secondary outcome measures:** Participants completed the Male Depression Risk Scale (MDRS-22), Patient Health Questionnaire (PHQ-9), and Kessler Psychological Distress Scale (K10). Probable depression was determined according to PHQ-9 scores  $\geq 10$ . Suicidality was determined based on a score  $\geq 1$  on item 9 of the PHQ-9. Probable mental illness was determined based on a K10 score  $\geq 25$ .

**Results:** The short form MDRS-22 consisted of seven items (MDRS-7) and captured all of the domains in the original tool. Results demonstrated that externalising symptoms, either alone or in combination with prototypic symptoms were significantly more common than exclusively prototypic symptoms. Participants in the mixed symptom group had significantly higher risk of mental illness and current suicidality. Furthermore, the MDRS-7 was shown to be effective at predicting elevated symptoms of depression at follow-up, after controlling for previous depression diagnoses.

**Conclusions:** Findings provide preliminary evidence of the potential utility of the MDRS-7 as a screening tool for externalised symptoms associated with major depression in men. Use of the MDRS-7 in primary care settings may facilitate identification of men at-risk of suicide and psychological distress who do not meet cut-off scores for existing measures of major depression symptoms.

**Key words:** depression, externalising symptoms, short form, men, lifespan, help-seeking

### 70 **Strengths and limitations of this study:**

- 71 • This is the first study to explore the psychometric properties of the MDRS-7 as a  
72 screening tool for externalised symptoms associated with major depression in men.
- 73 • Use of the MDRS-7 in primary care settings may facilitate identification of men at-  
74 risk of suicide and psychological distress.
- 75 • Diagnosis of depression was not verified by clinical interview.
- 76 • Field trials of the MDRS-7 are needed to demonstrate the utility of the tool in  
77 primary care settings.

### 79 **Introduction**

80 Major depressive disorder (MDD) is a common psychiatric condition and the leading  
81 cause of disability worldwide [1, 2]. MDD is twice as prevalent in women than men [3] and  
82 severe depression is known to significantly increase the risk of suicide [4]. Although men are  
83 less likely to be diagnosed with a depressive disorder [5], they are three times more likely to  
84 die by suicide compared to women [6]. Current approaches to the diagnosis of depression  
85 (e.g., as per ICD-11 or DSM-5 diagnostic criteria) emphasise symptoms including persistent  
86 sadness, loss of interest or pleasure in previously enjoyable activities, as well as changes in  
87 affect, cognition, and neurovegetative functioning [7, 8]. However, a growing number of  
88 studies suggest that a significant proportion of men suffering from depression might  
89 experience a distinct phenotype [9-11]. Congruent with masculine role norms, this male-  
90 typical phenotype includes anger, substance misuse, emotion suppression, and risk-taking  
91 domains [10, 12]. However, these putative symptoms are not included in standard  
92 diagnostic criteria or screening measures, and it has been suggested that this might account  
93 in part for the under-diagnosis of male depression cases, and therefore under-recognition of  
94 (and treatment for) men at heightened risk of suicide [13].

95 Whilst men are often regarded as being less likely to seek help than women, recent  
96 statistics largely do not support this claim. In Australia, it has been estimated that in the  
97 general population, around 89% of men attend primary care annually [14]. Among men  
98 experiencing mental health difficulties, annual primary care attendance is similarly high with  
99 estimates of 80% up to 96% of men with symptoms of depression reporting a visit to

1  
2  
3 100 primary care within the previous 12 months [15, 16]. Similarly, findings from the UK  
4  
5 101 demonstrate that whilst males are overall less likely to attend primary care compared to  
6  
7 102 females, attendance rates in men and women with comparable underlying morbidities,  
8  
9 103 including depression, are similar [17]. Furthermore, findings from a population study of  
10  
11 104 health care contacts among Canadian suicide decedents in Toronto also demonstrated that  
12  
13 105 over 60% ( $n = 1792$ ) of men who died by suicide accessed professional mental health care in  
14  
15 106 the year before their death [18]. These findings highlight the essential role of primary care  
16  
17 107 physicians in identifying depression and suicide risk in men in order to facilitate effective  
18  
19 108 treatment [19].

20 109 Growing interest in gender-sensitive assessment of men's depression has seen the  
21  
22 110 development of male-specific screening tools to identify symptoms that align with men's  
23  
24 111 socialisation and gender norm processes [e.g., 20, 21, 22]. One recently developed and  
25  
26 112 widely validated measure for assessing externalising symptoms in men is the Male  
27  
28 113 Depression Risk Scale (MDRS-22) [23]. The MDRS-22 consists of 22 items assessing six  
29  
30 114 symptom domains including emotion suppression, drug use, alcohol use, anger and  
31  
32 115 aggression, somatic symptoms, and risk-taking [23]. Recently, Zajac and colleagues [24]  
33  
34 116 demonstrated that this tool, used in conjunction with a measure of prototypic major  
35  
36 117 depression symptoms (PHQ-9), was able to stratify men into three distinct risk groups: (i)  
37  
38 118 prototypic symptoms (consistent with current MDD diagnostic criteria), (ii) externalising  
39  
40 119 symptoms consistent with masculine socialisation, and (iii) mixed depressive symptoms,  
41  
42 120 reflecting both internalised and externalised symptomology. Further analyses showed that  
43  
44 121 men in the externalising only group—men who are arguably missed when using measures of  
45  
46 122 internalising symptoms—were at significantly increased risk of suicide compared to non-  
47  
48 123 depressed men. Moreover, those with elevated externalised and prototypic symptomology  
49  
50 124 were at highest risk of mental illness as well as suicide [24], highlighting the potential of  
51  
52 125 early identification and intervention benefits of leveraging male-specific tools in primary  
53  
54 126 care settings.

55 127 Two-stage screening methods are commonly used in primary care, and have been  
56  
57 128 shown to be effective for increasing the recognition of depression [25]. However, many  
58  
59 129 primary care physicians report that time is a limiting factor in their capacity to  
60

1  
2  
3 130 comprehensively assess psychological issues, including depression [19, 26], despite  
4  
5 131 management of common mental disorders rating as a top reason for general practice  
6  
7 132 attendance [27]. To help address this issue, brief screening tools consisting of 15 items or  
8  
9 133 less are often used, given their completion time is usually just a couple of minutes [28].  
10  
11 134 Examples include the Patient Health Questionnaire (PHQ-9) [29], the Kessler Psychological  
12  
13 135 Distress Scale (K10) [30], and the Beck Depression Inventory for Primary Care (BDI-PC) [31].

14 136 To date, the MDRS-22 has demonstrated excellent psychometric properties as well  
15  
16 137 as the ability to detect different groups of men who may be at increased risk of suicide and  
17  
18 138 mental illness [e.g., 24, 32, 33]. However, given time constraints in primary care settings, the  
19  
20 139 length of the current MDRS-22 is arguably impractical [12]. The purpose of the present  
21  
22 140 study was to develop a short form of the MDRS-22 to facilitate its use as a screening tool in  
23  
24 141 busy and time-pressured health care settings. We also aimed to establish an initial set of  
25  
26 142 cut-off scores for interpretive purposes, as well as examine current and longitudinal risk of  
27  
28 143 suicidality and mental illness in subgroups. Furthermore, as adherence to masculine gender  
29  
30 144 norms has been found to decline as men get older [34], younger and older males were  
31  
32 145 examined separately to examine the utility of the tool across age groups.  
33

## 147 Method

### 148 Participants and procedure

34  
35  
36  
37  
38 149 This cross-sectional study included baseline data from a community sample of 514  
39  
40 150 younger males aged 18 to 64 years ( $M = 45.46$ ,  $SD = 14.52$ ) and 444 older males aged 65 to  
41  
42 151 93 years ( $M = 72.75$ ,  $SD = 5.86$ ). A subset of respondents ( $n = 167$  younger males;  $n = 173$   
43  
44 152 older males) participated in the follow-up component. On average, 35 weeks ( $M = 247.94$   
45  
46 153 days,  $SD = 24.47$  days) elapsed between the provision of T1 and T2. The mean age for the  
47  
48 154 overall sample was 58.11 years ( $SD = 17.73$ ). Eligible participants were Australian male  
49  
50 155 residents over the age of 18 years who considered themselves fluent in English. Participants  
51  
52 156 were recruited via paid advertisements displayed to Australian members of the Facebook  
53  
54 157 social networking site ( $n = 609$ ; 63.6%) and through promotion of the study to community  
55  
56 158 organisations (e.g., Rotary, Men's Shed). Time 1 (T1) data were collected between August  
57  
58 159 and November 2019 using an online questionnaire. However, participants from local



1  
2  
3 160 community organisations were provided with the option to complete a paper version of the  
4  
5 161 survey to ensure inclusivity and accessibility of the sample and  $n = 5$  participants completed  
6  
7 162 a paper version. Ethics approval was obtained from the University of Adelaide Human  
8  
9 163 Research Ethics Committee and the CSIRO Health and Medical Human Research Ethics  
10  
11 164 Committee (approval number H-2019-109). All participants provided informed consent.  
12  
13 165 Reporting adhered to the STROBE cross-sectional guidelines.  
14  
15 166

## 16 167 **Public involvement**

17  
18 168 Participants were not involved in the design or conduct of this research; however,  
19  
20 169 participants could nominate to receive updates on the results of the study.  
21  
22 170

## 23 171 **Measures**

### 24 25 172 26 27 173 ***Demographics***

28  
29 174 Participants reported their age, gender, relationship status, employment status, level  
30  
31 175 of education, and household income.  
32  
33 176

### 34 177 ***Male Depression Risk Scale (MDRS-22)***

35  
36 178 Externalising depression symptoms were assessed by the Male Depression Risk Scale  
37  
38 179 (MDRS-22) [23]. The MDRS-22 contains twenty-two self-report items designed to assess six  
39  
40 180 broad domains of externalising and male-specific depression symptoms present in the last  
41  
42 181 month including anger and aggression, drug use, alcohol use, emotion suppression, risk-  
43  
44 182 taking, and somatic symptoms using the response format of 5-point Likert scale ranging  
45  
46 183 from 0 (*none of the time*), 1 (*a little of the time*), 2 (*some of the time*), 3 (*most of the time*),  
47  
48 184 and 4 (*all of the time*). Cronbach's alphas for the MDRS are reported in Table 3 for both age  
49  
50 185 groups and for the overall sample and are considered adequate.  
51  
52 186

### 53 187 ***The Patient Health Questionnaire (PHQ-9)***

54  
55 188 The Patient Health Questionnaire (PHQ-9) [29] is a self-report depression screening tool for  
56  
57 189 use in primary care that assesses nine symptoms consistent with the DSM-5 diagnostic  
58  
59  
60

1  
2  
3 190 criteria for major depressive disorder [7]. Participants endorse how often they have  
4  
5 191 experienced each symptom (e.g., “*Feeling down, depressed, or hopeless*”) during the  
6  
7 192 preceding two-week period using a 4-point Likert scale ranging from 0 (*not at all*) to 3  
8  
9 193 (*almost every day*). A score of 10 and above is indicative of clinically significant depressive  
10  
11 194 symptoms [35]. In addition to utilising total PHQ-9 scores, we used item 9 as a measure of  
12  
13 195 suicidality: “Over the past two weeks, how often have you been bothered by thoughts that  
14  
15 196 you would be better off dead, or of hurting yourself in some way?”. We deemed those who  
16  
17 197 scored 1 or more on this item to be currently experiencing suicidal ideation. Internal  
18  
19 198 consistency of the PHQ-9 in the present study for the overall sample was high ( $\alpha = .93$ ).  
19  
20 199

### 21 200 ***Kessler Psychological Distress Scale (K10)***

22 201 The Kessler Psychological Distress Scale (K10) [30] is a widely used measure in both research  
23  
24 202 and primary care settings [36]. It comprises ten questions assessing a person’s negative  
25  
26 203 emotional state in the preceding 30 days (e.g., “*About how often did you feel so nervous*  
27  
28 204 *that nothing could calm you down*”). Responses are based on a 5-point Likert scale ranging  
29  
30 205 from 1 (*none of the time*) to 5 (*all of the time*). In addition to examining K10 total scores, we  
31  
32 206 created a binary variable with scores  $\geq 25$  indicating probable mental illness, consistent with  
33  
34 207 published cut-off scores for the K10 [37]. Internal consistency of the K10 in this study for the  
35  
36 208 overall sample was high ( $\alpha = .95$ ).  
37  
38 209

### 40 210 **Statistical analyses**

41 211 Data for the present study was analysed using IBM SPSS Statistics (Version 26.0)  
42  
43 212 except for the Confirmatory Factor Analysis undertaken in JASP [Version 0.13.1; 38]. A total  
44  
45 213 of 1114 participants commenced the study. However, 156 participants were not included in  
46  
47 214 the analyses due to substantial missing data. Thus,  $N = 958$  participants who provided  
48  
49 215 complete data for the items comprising the MDRS-22 were included in the item reduction  
50  
51 216 process described below. Of this sample,  $n = 29$  did not provide complete data for the PHQ-  
52  
53 217 9 or K10 items. Thus, models using these variables comprised  $n = 929$  participants.

54 218 Various recommendations exist for the selection of items for short-form surveys [39,  
55  
56 219 40]. Broadly speaking, the focus is on selecting items with maximum variability and which

1  
2  
3 220 retain the theorised underlying construct—as well as sub-domains—measured by the long-  
4  
5 221 form scale. Therefore, we calculated descriptive (means, standard deviation (*SD*), and  
6  
7 222 skewness) and relational statistics (correlations) for each item (see Table 2). Items were  
8  
9 223 scored for each statistic (i.e., largest *SD*, strongest correlation etc) and summed across the  
10  
11 224 statistical indices to derive a total score for each item. Best performing items were subject  
12  
13 225 to Exploratory Factor Analysis with Maximum Likelihood Estimation performed within each  
14  
15 226 age group, and in the combined sample. Parallel Analysis consisting of 1,000 permutations  
16  
17 227 of the original raw data was used to determine thresholds for retaining factors. Stability of  
18  
19 228 this solution was then established using Confirmatory Factor Analysis of Time 2 Data ( $n =$   
20  
21 229 340). Fit indices reported include: comparative fit index (CFI); the Tucker-Lewis index (TLI);  
22  
23 230 the root mean square error of approximation (RMSEA); and the standardized root mean  
24  
25 231 residual (SRMR). Interpretation of these indices were guided by the recommendations of Hu  
26  
27 232 & Bentler [41].

27 233 In order to demonstrate clinical utility of the reduced item scale, cut-off scores were  
28  
29 234 determined for Low (0 – 5), Moderate (6 – 7), Severe (8 – 12) and Extremely severe (13+)  
30  
31 235 symptom severity groups. These scores corresponded to cut-off percentiles representing  
32  
33 236 differing degrees of increased risk of recent suicide attempt previously identified for the  
34  
35 237 MDRS-22 [33]. Individuals were then classified into depression groups using the MDRS-7 in  
36  
37 238 combination with the PHQ-9 as follows: not depressed (PHQ-9 < 10 and MDRS-7 ≤ 5),  
38  
39 239 prototypical depression features (PHQ-9 ≥ 10 and MDRS-7 ≤ 5), mixed features (PHQ-9 ≥ 10  
40  
41 240 and MDRS-7 > 5) and externalising features (PHQ-9 < 10 and MDRS-7 > 5). In addition, the  
42  
43 241 K10 was used to determine those individuals suffering a moderate mental illness (K10 ≥ 25)  
44  
45 242 from those without a mental illness (K10 < 25), and current suicidality was ascribed based  
46  
47 243 on scores ≥ 1 on PHQ-9 item 9: “Over the past two weeks, how often have you been  
48  
49 244 bothered by thoughts that you would be better off dead, or of hurting yourself in some  
50  
51 245 way?”. Finally, Generalised linear models (GLMs) were used to examine differences in K10  
52  
53 246 and PHQ-9 scores across the MDRS-7 categories to determine risk of mental illness and  
54  
55 247 current suicidality and to examine risk of Depression at Time 2 (PHQ-9 ≥ 10). Assumptions of  
56  
57 248 GLMs were considered through inspection of scatter plots and histograms of residuals and  
58  
59 249 predicted values, with model results reported as standardised betas.

## Results

### *Sample characteristics*

Table 1 presents the characteristics of the study participants at T1. As expected, there was a higher proportion of older participants who reported themselves as married/de-facto or widowed/divorced/separated, in comparison to younger men. Regarding education, the majority of older participants completed year 11 or below, whilst the proportion of participants completing a Bachelor's degree was higher in the younger sample. In addition, household income appeared to be higher in younger compared to older men, consistent with the majority of the older sample reporting themselves as being retired.

-----  
Insert Table 1 about here  
-----

### *Item reduction*

Descriptive and relational statistics for each of the MDRS-22 items across younger and older age groups are displayed in Supplementary Table 1. For the emotion suppression, alcohol use, somatic symptoms, and drug use domains, a single highest scoring item emerged congruent across age groups. For the anger and aggression domain, two different items were retained because of their performance across the age groups. Finally, although two risk-taking items scored equally well in the younger group, only one of those showed sensitivity within the older age group and only this item was retained, resulting in a total selection of seven items for the short form scale covering all of the original MDRS-22 domains.

Factor analysis of these seven items revealed the presence of a single underlying domain that satisfied criteria determined by the parallel analysis; eigenvalues were required to exceed 1.16. As shown in Table 2, all items demonstrated a moderate-to-strong loading on the underlying component except for those measuring alcohol and drug use, which loaded weakly. When modelling these 7-items using CFA at Time 2, the initial solution

1  
2  
3 280 specifying all items loading on a single latent MDRS-7 factor was not quite adequate [ $\chi^2(14)$   
4 = 62.23  $p < .001$ , CFI = 0.96, TLI = .94, RMSEA = 0.10 (.077-.128), SRMR = .10]. However,  
5 281  
6  
7 282 allowing the errors of the two items assessing anger and physical aggression to covary  
8  
9 283 resulted in excellent model fit [ $\chi^2(13) = 28.08$   $p = .04$ , CFI = 0.99, TLI = .98, RMSEA = .059  
10 284 (.028-.089), SRMR = .085].  
11  
12  
13  
14  
15

16 287 -----  
Insert Table 2 about here  
17  
18 288 -----

### 21 290 *Cut-off scores for the short scale*

23 291 The proportion of men in each of the different MDRS-7 symptom severity categories  
24 292 are shown in Supplementary Figure 1 for the total sample, and by age group. As can be  
25 293 seen, older men appear more likely to be in the 'low' category of symptoms, and less likely  
26 294 to be in the 'severe' or 'extremely severe' categories compared to younger males. Figure 1  
27 295 shows the effect of age and MDRS-7 categories on prototypic depression (PHQ-9) and  
28 296 psychological distress (K10). For PHQ-9, there were significant differences between all  
29 297 MDRS-7 groups [ $f(3, 921) = 208.04$ ,  $p < .001$ ] and between age groups [ $f(1, 921) = 28.45$ ,  $p <$   
30 298  $.001$ ], with no significant interaction between MDRS-7 and age [ $f(3, 921) = 0.45$ ,  $p = .71$ ]. For  
31 299 the K10, results were similar: significant differences between all MDRS-7 groups [ $f(3,921) =$   
32 300  $190.93$ ,  $p < .001$ ] and between younger and older men [ $f(1,921) = 34.77$ ,  $p < .001$ ], but no  
33 301 interaction between MDRS-7 and age [ $f(3, 921) = 0.43$ ,  $p = .73$ ].  
34  
35  
36  
37  
38  
39  
40  
41  
42  
43  
44  
45  
46

47 304 -----  
Insert Figure 1 about here  
48  
49 305 -----

### 51 306 52 307 *Clinical utility of the MDRS-7*

54 308 The proportion of males according to depressive classification type is shown in  
55 309 Supplementary Figure 2. Externalised-only depression affected approximately 10% of  
56  
57  
58  
59  
60

1  
2  
3 310 younger and older males, whilst prototypical and mixed depressive symptoms were more  
4  
5 311 common in younger males. Table 3 shows the risk of mental illness and suicidality compared  
6  
7 312 to non-depressed participants within each age group after controlling for a previous  
8  
9 313 diagnosis of depression. All classifications were associated with both outcome measures.  
10  
11 314 Individuals with mixed symptoms undoubtedly have the highest risk of suicidality and  
12  
13 315 mental illness.

14 316

16 317

---

18 318 Insert Table 3 about here

---

19 319

21 320

23 321 A final GLM considered the likelihood of being classified as depressed at follow-up  
24  
25 322 based on responses to the PHQ-9 (i.e., score  $\geq 10$ ). MDRS-7 category was entered as a  
26  
27 323 predictor controlling for PHQ-9 scores at time 1, previous diagnosis of depression and age.  
28  
29 324 As shown in Table 4, PHQ scores at time 1 were significantly associated with increased risk  
30  
31 325 of depression at time 2 although age and prior diagnoses were not significantly associated.  
32  
33 326 Those classified as having moderate MDRS-7 symptoms at time 1 were significantly more  
34  
35 327 likely than those in the low symptom category to be classified as depressed at Time 2, whilst  
36  
37 328 the severe and extremely severe categories were not associated with increased risk.

38 329

40 330

---

42 331 Insert Table 4 about here

---

43 332

### 45 333 Discussion

47 334 Clinical reports and emergent empirical work suggest that men's depression may be  
48  
49 335 under-detected as a result of prototypic screening tools that may be insensitive to men's  
50  
51 336 gender role socialisation [11, 13, 42]. The Male Depression Risk Scale (MDRS-22) assesses  
52  
53 337 male-specific, externalised symptoms of depression, such as substance misuse, risk-taking,  
54  
55 338 and anger. However, in its current 22-item form, it is impractical for rapid use in primary  
56  
57 339 care, particularly when used alongside traditional depression screening tools [12]. The

1  
2  
3 340 present research aimed to derive a short form of the MDRS-22, examine its psychometric  
4  
5 341 properties and relationship with psychological distress and depression in order to  
6  
7 342 demonstrate its utility as a potential screening tool in primary and other health care  
8  
9 343 settings.

10 344 The short form derived herein comprises seven items, representing 1 item for each of  
11  
12 345 the original MDRS domains including emotion suppression, risk-taking, substance use, drug  
13  
14 346 use, somatic symptoms, and two items for the anger and aggression domain, based on  
15  
16 347 criteria including variability within items, the item's relationship to its original MDRS domain  
17  
18 348 but also with the overall MDRS score. Five of the seven items demonstrated moderate-to-  
19  
20 349 strong loadings on a single underlying construct presumed to reflect the male depression  
21  
22 350 phenotype, whilst two items assessing alcohol and drug use loaded weakly. This likely  
23  
24 351 reflects the reduced variability of participant responses on these items, with most  
25  
26 352 participants reporting that these items applied to them none, or a little of the time.  
27  
28 353 However, despite these lower loadings, items that tap these behaviours are important to  
29  
30 354 retain given that substance use is an important marker of depression and suicidality in men  
31  
32 355 and particularly those who adhere to masculine norms [42, 43].

33 356 In the present study, externalising symptoms, either alone or in combination with  
34  
35 357 prototypic symptoms, were found to be significantly more common than exclusively  
36  
37 358 prototypic symptoms. Approximately 10% of younger and older males were found to  
38  
39 359 present with uniquely externalising symptoms, whilst approximately 40% of younger males  
40  
41 360 and 10% of older males presented with mixed symptoms. These findings are consistent with  
42  
43 361 previous research using the MDRS-22 [24] and highlights the potential utility of the MDRS-7  
44  
45 362 for detecting additional cases of men at risk. These men are a subset who score below  
46  
47 363 threshold on traditional prototypic measures, but whose degree of externalised behaviours  
48  
49 364 may be problematic. Furthermore, despite the absence of clinically elevated prototypic  
50  
51 365 symptoms, both younger and older males in the mixed symptom group had a significantly  
52  
53 366 higher risk of a mental illness after controlling for a previous diagnosis of depression,  
54  
55 367 demonstrating unequivocally that this represents a unique group of at-risk men  
56  
57 368 experiencing psychological distress. Similarly, both younger and older males in the mixed  
58  
59 369 symptom group had a significantly elevated risk of suicidality. These findings are consistent  
60

1  
2  
3 370 with research by Zajac and colleagues [24] and highlight the clinical importance of  
4  
5 371 considering a broad range of potential presentations of depression in men, all of which are  
6  
7 372 associated with increased risk of poor outcomes.

8  
9 373 The MDRS-7 was also shown to be effective at predicting depression at a later time  
10  
11 374 point, suggesting a possible prodromal effect. These findings are consistent with those by  
12  
13 375 [44] who demonstrated that externalising symptoms predicted a future depressive episode  
14  
15 376 in men. Hence, our findings may reflect early symptom expression, or even attempts of men  
16  
17 377 to cope with what has the potential to develop into a threshold depressive disorder. This  
18  
19 378 further highlights the potential value of screening for externalising symptoms to facilitate  
20  
21 379 early intervention and prevention of further mental health issues [45]. In addition, given the  
22  
23 380 externalised nature of male-typical symptoms of depression, it is important to note that  
24  
25 381 these symptoms not only affect men's health and wellbeing but also the health wellbeing of  
26  
27 382 their families, friends, and communities [13, 46, 47]. Hence the better identification and  
28  
29 383 management of male depression is likely to have substantial public health implications.

30 384

### 31 385 **Clinical implications**

32  
33 386 There is an urgent need for health services and providers to utilise more sensitive  
34  
35 387 diagnostic tools as a means of improving the detection of depression and psychological  
36  
37 388 distress in males and addressing the high rates of male suicide [13]. The use of brief tools  
38  
39 389 such as the MDRS-7 may assist with detecting unique cases of men who would score below  
40  
41 390 threshold on measures such as the PHQ-9. However, an added benefit of using this scale  
42  
43 391 alongside prototypic measures, is the ability to detect men presenting with mixed  
44  
45 392 symptomology whose risk of suicide and poor mental health outcomes is significantly  
46  
47 393 elevated. Therefore, the clinical utility of this measure may extend beyond screening and  
48  
49 394 detection and into the therapy setting where it is necessary to determine, monitor, and  
50  
51 395 manage differing degrees of suicidality.

52 396

### 53 397 **Limitations and future research**

54  
55 398 The methodology adopted in this study is not without limitations. The use of an  
56  
57 399 online community sample of Australian males limits the generalisability of the findings to



1  
2  
3 400 other populations. Future research should examine the psychometric properties of the  
4  
5 401 MDRS-7 with additional populations, including clinical samples of men presenting to primary  
6  
7 402 care. In addition, as data was self-report, diagnosis of depression could not be verified at  
8  
9 403 clinical interview. The results of this study would be strengthened by a more rigorous  
10  
11 404 assessment of psychopathology and comorbidity. It is also important to acknowledge that  
12  
13 405 this study used a single item from the PHQ-9 to examine current suicidal ideation.  
14  
15 406 Therefore, there is a need for additional research to examine the relationship between the  
16  
17 407 MDRS-7 and other measures of suicidality, including recent suicide attempt.  
18  
19

## 409 **Conclusion**

21 410 The present study provides important information on the development and  
22  
23 411 validation of the MDRS-7. Specifically, this study demonstrates that the MDRS-7 is a valid  
24  
25 412 and reliable measure of externalising and male-typical depression symptoms in both  
26  
27 413 younger and older men in terms of its psychometric properties as well as its sensitivity to  
28  
29 414 prototypic depression symptoms, psychological distress, and suicidality. Use of male-specific  
30  
31 415 measures of depression such as the MDRS-7 may improve the detection of depression and  
32  
33 416 suicide risk in men, and adjunctive use (alongside established prototypical scales such as the  
34  
35 417 PHQ-9) may contribute to improved public health outcomes.  
36  
37

## 38 419 **Acknowledgements**

40 420 The authors thank all participants for contributing to this study. The authors would also like  
41  
42 421 to acknowledge Lynn Ward for her valuable suggestions on earlier drafts of the manuscript.  
43  
44

## 45 422 **Author contributions**

46 423 D.H., S.R., and I.Z. developed the study concept. D.H. and I.Z. performed the data analyses.  
47  
48 424 D.H. drafted the paper and S.R. and I.Z. provided critical revisions. All authors approved the  
49  
50 425 final version of the paper for submission.  
51  
52

## 54 427 **Funding**

56 428 D.H. is supported by an Australian Government Research Training Program Scholarship and  
57  
58  
59  
60

Table 1. Sociodemographic characteristics of participants at Time 1

| Variable                          | Younger men<br>( $< 65$ ) | Older men<br>( $\geq 65$ ) |
|-----------------------------------|---------------------------|----------------------------|
| <i>n</i>                          | 514                       | 444                        |
| Age range                         | 18-64                     | 65-93                      |
| Age, <i>M</i> ( <i>SD</i> )       | 45.5 (14.5)               | 72.8 (5.9)                 |
| Relationship status, <i>n</i> (%) |                           |                            |
| Single (never married)            | 119 (23.2)                | 12 (2.7)                   |
| Widowed/divorced/separated        | 70 (13.6)                 | 95 (21.4)                  |
| Married/de-facto                  | 323 (62.8)                | 334 (75.2)                 |
| Prefer not to say                 | 2 (0.4)                   | 3 (0.7)                    |
| Employment status, <i>n</i> (%)   |                           |                            |
| Employed full-time                | 227 (44.2)                | 22 (5.0)                   |
| Employed part-time                | 38 (7.4)                  | 18 (4.1)                   |
| Employed casually                 | 67 (13.0)                 | 14 (3.2)                   |
| Not employed or unpaid work       | 97 (18.9)                 | 13 (2.9)                   |
| Retired                           | 73 (14.2)                 | 375 (84.5)                 |

429 a CSIRO Supplementary Scholarship. S.R. is supported by an NHMRC Career Development  
 430 Fellowship (GNT1158881) from the Australian Government. These funding bodies had no  
 431 influence on the design of the study and collection, analysis, or interpretation of data or in  
 432 writing the manuscript.

#### 434 **Ethics approval**

435 Ethics approval was obtained from the University of Adelaide Human Research Ethics  
 436 Committee and the CSIRO Health and Medical Human Research Ethics Committee (approval  
 437 number H-2019-109). All participants provided informed consent.

#### 439 **Competing interests**

440 The authors declare that they have no competing interests.

#### 442 **Data sharing statement**

443 Data is available upon reasonable request.

|    |                                          |            |            |
|----|------------------------------------------|------------|------------|
| 1  |                                          |            |            |
| 2  |                                          |            |            |
| 3  | Prefer not to say                        | 12 (2.3)   | 2 (0.5)    |
| 4  | Household income, <i>n</i> (%)           |            |            |
| 5  | <\$35,000                                | 139 (27.0) | 143 (32.2) |
| 6  | \$35,000-\$65,000                        | 92 (17.9)  | 159 (35.8) |
| 7  | \$65,000-\$105,000                       | 100 (19.5) | 80 (18.0)  |
| 8  | \$105,000-\$160,000                      | 97 (18.9)  | 31 (7.0)   |
| 9  | >\$160,000                               | 65 (12.6)  | 12 (2.7)   |
| 10 | Prefer not to say                        | 21 (4.1)   | 19 (4.3)   |
| 11 | Highest level of education, <i>n</i> (%) |            |            |
| 12 | Year 11 or below                         | 50 (9.7)   | 83 (18.7)  |
| 13 | Year 12                                  | 52 (10.1)  | 49 (11.0)  |
| 14 | Certificate/diploma                      | 156 (30.4) | 133 (30.0) |
| 15 | Bachelor's degree                        | 139 (27.0) | 76 (17.1)  |
| 16 | Graduate certificate/diploma             | 44 (8.6)   | 39 (8.8)   |
| 17 | Postgraduate degree                      | 72 (14.0)  | 56 (12.6)  |
| 18 | Prefer not to say                        | 1 (0.2)    | 8 (1.8)    |

Note. Time 2 *n*'s (younger men = 167; older men = 173).

% may not equal 100% due to rounding.

446

447

448 Table 2. Item loadings derived from Principal Components Analysis, and Cronbach's Reliability Alpha

| Domains             | Items                                                 | 18-64     | 65+       | Overall   | Time 2 |
|---------------------|-------------------------------------------------------|-----------|-----------|-----------|--------|
| Emotion Suppression | I bottled up my negative feelings                     | 0.53      | 0.61      | 0.60      | 0.65   |
| Alcohol Use         | I needed alcohol to help me unwind                    | 0.29      | 0.30      | 0.34      | 0.38   |
| Somatic Symptoms    | I had unexplained aches and pains                     | 0.42      | 0.44      | 0.46      | 0.64   |
| Aggression          | I overreacted to situations with aggressive behaviour | 0.68      | 0.74      | 0.69      | 0.30   |
| Anger               | It was difficult to manage my anger                   | 0.76      | 0.73      | 0.74      | 0.65   |
| Drug Use            | Using drugs provided temporary relief                 | 0.22      | 0.31      | 0.28      | 0.47   |
| Risk-Taking         | I stopped caring about the consequences of my actions | 0.47      | 0.50      | 0.52      | 0.77   |
|                     | <i>Eigenvalue</i>                                     | 2.52      | 2.73      | 2.71      |        |
|                     | <i>Variance explained (%)</i>                         | 36.00     | 38.90     | 38.80     |        |
|                     | <i>Cronbach's alpha</i>                               | .69       | .73       | .73       |        |
|                     | <i>Correlation with MDRS-22</i>                       | .94       | .94       | .94       |        |
|                     | <i>Short form re-test reliability</i>                 | .70       | .69       | .70       |        |
|                     | <i>M (SD)</i>                                         | 5.9 (4.0) | 3.5 (3.4) | 4.8 (3.9) |        |

449 Note. Time 2 loadings derived using Confirmatory Factor Analysis (CFA) in the combined sample.

450

451 Table 3. Odds of mental illness and current suicidality controlling for previous diagnosis of  
 452 depression

|       |                                          | Not<br>depressed | Prototypical<br>depression | Externalised<br>depression | Mixed<br>depression   |
|-------|------------------------------------------|------------------|----------------------------|----------------------------|-----------------------|
| 18-64 | Depressed group, <i>n</i>                | 193              | 71                         | 49                         | 187                   |
|       | Moderate mental<br>illness, <i>n</i> (%) | 11 (6%)          | 56 (79%)                   | 10 (20%)                   | 163 (87%)             |
|       | OR (95% CI)                              | 1                | 54.77 (23.5 - 127.9)       | 4.24 (1.7 - 10.9)          | 95.23 (44.8 - 202.2)  |
|       | Suicidality, <i>n</i> (%)                | 13 (7%)          | 43 (61%)                   | 9 (18%)                    | 137 (73%)             |
|       | OR (95% CI)                              | 1                | 19.01 (9.0 - 40.0)         | 3.1 (1.2 - 7.7)            | 33.2 (17.2 - 64.2)    |
| 65+   | Depressed group, <i>n</i>                | 310              | 20                         | 45                         | 54                    |
|       | Moderate mental<br>illness, <i>n</i> (%) | 5 (2%)           | 8 (40%)                    | 6 (13%)                    | 36 (67%)              |
|       | OR (95% CI)                              | 1                | 30.24 (8.3 - 109.6)        | 8.0 (2.3 - 27.7)           | 106.01 (36.8 - 305.1) |
|       | Suicidality, <i>n</i> (%)                | 19 (6%)          | 8 (40%)                    | 11 (24%)                   | 41 (76%)              |
|       | OR (95% CI)                              | 1                | 8.3 (3.0 - 23.5)           | 4.5 (1.9 - 10.3)           | 43.2 (19.7 - 94.8)    |

453 *Note.* OR for previous depression diagnosis not shown.

454 Mental illness defined as K10  $\geq$  25.

455 Suicidality defined as  $\geq$  1 on PHQ-9 item 9.

456

457

458

459

460

461

462

463

464

465

466

467

468 Table 4. Odds of being classified as depressed at follow up

| Outcome: Depressed (PHQ-9 $\geq$ 10) at Time 2 ( $n = 340$ ) |        |       |       |
|--------------------------------------------------------------|--------|-------|-------|
|                                                              | OR     | CI    |       |
| Age (older)                                                  | 1.39   | 0.671 | 2.875 |
| Previous depression diagnosis (yes)                          | 1.97   | 0.945 | 4.119 |
| PHQ-9 T1                                                     | 1.25** | 1.158 | 1.342 |
| Moderate (MDRS-7)                                            | 2.76** | 1.185 | 6.437 |
| Severe (MDRS-7)                                              | 1.74   | 0.679 | 4.458 |
| Extremely severe (MDRS-7)                                    | 1.44   | 0.258 | 8.051 |

Note. Reference category = low symptoms.

\*\* $p < .01$ .

469

470

471

472

473

474

475

476

477

478

479

480

481

1  
2  
3 482 Figure 1. Effect of age and MDRS-7 category on prototypic depression symptoms  
4  
5 483 (PHQ-9) and psychological distress (K10)  
6

7 484

8  
9 485

### References

- 10  
11 486 1. Friedrich, M.J., *Depression is the leading cause of disability around the world*. JAMA,  
12  
13 487 2017. **317**(15): p. 1517-1517.  
14  
15 488 2. Costantini, L., et al., *Screening for depression in primary care with Patient Health*  
16  
17 489 *Questionnaire-9 (PHQ-9): A systematic review*. Journal of Affective Disorders, 2021.  
18  
19 490 **279**: p. 473-483.  
20  
21 491 3. World Health Organization, *Depression and Other Common Mental Disorders: Global*  
22  
23 492 *Health Estimates*, W.H. Organization, Editor. 2017, World Health Organization:  
24  
25 493 Geneva.  
26  
27 494 4. Chesney, E., G.M. Goodwin, and S. Fazel, *Risks of all-cause and suicide mortality in*  
28  
29 495 *mental disorders: A meta-review*. World Psychiatry, 2014. **13**(2): p. 153-160.  
30  
31 496 5. Mauvais-Jarvis, F., et al., *Sex and gender: modifiers of health, disease, and medicine*.  
32  
33 497 The Lancet, 2020. **396**(10250): p. 565-582.  
34  
35 498 6. World Health Organization, *Preventing suicide: A global imperative*. 2014, World  
36  
37 500 Health Organization: Geneva.  
38  
39 501 7. American Psychiatric Association, *Diagnostic and statistical manual of mental*  
40  
41 502 *disorders: DSM-5*. fifth ed. 2013, Arlington, VA: American Psychiatric Association.  
42  
43 503 8. World Health Organization, *International classification of diseases for mortality and*  
44  
45 504 *morbidity statistics 2018*.  
46  
47 505 9. Whittle, E.L., et al., *Men, Depression, and Coping: Are We on the Right Path?*  
48  
49 506 *Psychology of men & masculinity*, 2015. **16**(4): p. 426-438.  
50  
51 507 10. Cavanagh, A., et al., *Symptom endorsement in men versus women with a diagnosis of*  
52  
53 508 *depression: A differential item functioning approach*. International Journal of Social  
54  
55 509 *Psychiatry*, 2016. **62**(6): p. 549-559.  
56  
57 510 11. Martin, L.A., H.W. Neighbors, and D.M. Griffith, *The experience of symptoms of*  
58  
59 511 *depression in men vs women: Analysis of the National Comorbidity Survey*  
60  
*Replication*. JAMA Psychiatry, 2013. **70**(10): p. 1100-6.

- 1  
2  
3 512 12. Rice, S.M., et al., *Male-Type and Prototypal Depression Trajectories for Men*  
4  
5 513 *Experiencing Mental Health Problems*. Int J Environ Res Public Health, 2020. **17**(19).  
6  
7 514 13. Call, J.B. and K. Shafer, *Gendered Manifestations of Depression and Help Seeking*  
8  
9 515 *Among Men*. American Journal of Men's Health, 2015. **12**(1): p. 41-51.  
10  
11 516 14. Australian Bureau of Statistics, *Health Service Usage and Health Related Actions,*  
12  
13 517 *Australia, 2014-15 (Cat. No. 4364.0.55.002)*. 2017, Australian Bureau of Statistics:  
14  
15 518 Canberra.  
16  
17 519 15. Australian Institute of Family Studies, *Mental health of Australian males: Depression,*  
18  
19 520 *suicidality and loneliness*. 2020.  
20  
21 521 16. Martin, S., et al., *Effect of depression on health service utilisation in men: a*  
22  
23 522 *prospective cohort study of Australian men aged 35 to 80 years*. BMJ Open, 2021.  
24  
25 523 **11**(3): p. e044893.  
26  
27 524 17. Wang, Y., et al., *Do men consult less than women? An analysis of routinely collected*  
28  
29 525 *UK general practice data*. BMJ Open, 2013. **3**(8): p. e003320.  
30  
31 526 18. Schaffer, A., et al., *Population-based analysis of health care contacts among suicide*  
32  
33 527 *decedents: identifying opportunities for more targeted suicide prevention strategies*.  
34  
35 528 World Psychiatry, 2016. **15**(2): p. 135-145.  
36  
37 529 19. Lakkis, N.A. and D.M. Mahmassani, *Screening instruments for depression in primary*  
38  
39 530 *care: A concise review for clinicians*. Postgraduate Medicine, 2015. **127**(1): p. 99-106.  
40  
41 531 20. Brownhill, S., et al., *'For men only'. A mental health prompt list in primary care*.  
42  
43 532 Australian family physician, 2003. **32**(6): p. 443.  
44  
45 533 21. Zierau, F., et al., *The Gotland Male Depression Scale: A validity study in patients with*  
46  
47 534 *alcohol use disorder*. Nordic Journal of Psychiatry, 2002. **56**(4): p. 265-271.  
48  
49 535 22. Magovcevic, M. and M. Addis, *The Masculine Depression Scale: Development and*  
50  
51 536 *psychometric evaluation*. Psychology of Men & Masculinity, 2008. **9**(3): p. 117-132.  
52  
53 537 23. Rice, S.M., et al., *Development and preliminary validation of the male depression risk*  
54  
55 538 *scale: Furthering the assessment of depression in men*. Journal of Affective Disorders,  
56  
57 539 2013. **151**(3): p. 950-958.  
58  
59  
60



- 1  
2  
3 540 24. Zajac, I.T., et al., *Suicide risk, psychological distress and treatment preferences in men*  
4 541 *presenting with prototypical, externalising and mixed depressive symptomology.*  
5 542 *Journal of Mental Health, 2020: p. 1-8.*  
6  
7 543 25. Ferenchick, E.K., P. Ramanuj, and H.A. Pincus, *Depression in primary care: part 1—*  
8 544 *screening and diagnosis.* BMJ, 2019. **365**: p. l794.  
9  
10 545 26. Hutton, C. and J. Gunn, *Do longer consultations improve the management of*  
11 546 *psychological problems in general practice? A systematic literature review.* BMC  
12 547 *Health Services Research, 2007. 7(1): p. 71.*  
13  
14 548 27. The Royal Australian College of General Practitioners, *General Practice: Health of the*  
15 549 *Nation 2018.* 2018: East Melbourne, Vic.  
16  
17 550 28. Mitchell, A.J. and J.C. Coyne, *Do ultra-short screening instruments accurately detect*  
18 551 *depression in primary care? A pooled analysis and meta-analysis of 22 studies.* The  
19 552 *British journal of general practice : the journal of the Royal College of General*  
20 553 *Practitioners, 2007. 57(535): p. 144-151.*  
21  
22 554 29. Kroenke, K., R.L. Spitzer, and J.B. Williams, *The PHQ-9: Validity of a brief depression*  
23 555 *severity measure.* *Journal of General Internal Medicine, 2001. 16(9): p. 606-613.*  
24  
25 556 30. Kessler, R.C., et al., *Short screening scales to monitor population prevalences and*  
26 557 *trends in non-specific psychological distress.* *Psychological Medicine, 2002. 32(6): p.*  
27 558 *959-976.*  
28  
29 559 31. Beck, A.T., et al., *Screening for major depression disorders in medical inpatients with*  
30 560 *the Beck Depression Inventory for Primary Care.* *Behaviour Research and Therapy,*  
31 561 *1997. 35(8): p. 785-791.*  
32  
33 562 32. Rice, S.M., et al., *Externalizing depression symptoms among Canadian males with*  
34 563 *recent suicidal ideation: A focus on young men.* *Early Intervention in Psychiatry,*  
35 564 *2019. 13(2): p. 308-313.*  
36  
37 565 33. Rice, S.M., et al., *Validity of the Male Depression Risk Scale in a representative*  
38 566 *Canadian sample: sensitivity and specificity in identifying men with recent suicide*  
39 567 *attempt.* *J Ment Health, 2019. 28(2): p. 132-140.*  
40  
41  
42  
43  
44  
45  
46  
47  
48  
49  
50  
51  
52  
53  
54  
55  
56  
57  
58  
59  
60

- 1  
2  
3 568 34. Herreen, D., et al., *Associations between conformity to masculine norms and*  
4 569 *depression: age effects from a population study of Australian men.* BMC Psychology,  
5 570 2021. **9**(1): p. 32.  
6  
7  
8 571 35. Kroenke, K., et al., *The Patient Health Questionnaire somatic, anxiety, and depressive*  
9 572 *symptom scales: A systematic review.* General Hospital Psychiatry, 2010. **32**(4): p.  
10 573 345-359.  
11  
12 574 36. Stolk, Y., I. Kaplan, and J. Szwarc, *Clinical use of the Kessler psychological distress*  
13 575 *scales with culturally diverse groups.* International Journal of Methods in Psychiatric  
14 576 Research, 2014. **23**(2): p. 161-183.  
15  
16 577 37. Australian Bureau of Statistics, *National Health Survey: Users' guide 2014-2015 (Cat.*  
17 578 *No. 4363.0).* 2019, Australian Bureau of Statistics: Canberra.  
18  
19 579 38. JASP Team, *JASP (Version 0.13.1).* 2020.  
20  
21 580 39. Pather, S. and C.S. Uys, *Using scale reduction techniques for improved quality of*  
22 581 *survey information.* South African journal of information management, 2008. **10**(3).  
23  
24 582 40. Stanton, J.M., et al., *Issues and strategies for reducing the length of self-report*  
25 583 *scales.* Personnel psychology, 2002. **55**(1): p. 167-194.  
26  
27 584 41. Hu, L.t. and P.M. Bentler, *Cutoff criteria for fit indexes in covariance structure*  
28 585 *analysis: Conventional criteria versus new alternatives.* Structural Equation Modeling:  
29 586 A Multidisciplinary Journal, 1999. **6**(1): p. 1-55.  
30  
31 587 42. Addis, M.E., *Gender and depression in men.* Clinical Psychology: Science & Practice,  
32 588 2008. **15**(3): p. 153-168.  
33  
34 589 43. Coleman, D., *Traditional masculinity as a risk factor for suicidal ideation: Cross-*  
35 590 *sectional and prospective evidence from a study of young adults.* Archives of Suicide  
36 591 Research, 2015. **19**(3): p. 366-384.  
37  
38 592 44. Kendler, K.S. and C.O. Gardner, *Sex differences in the pathways to major depression:*  
39 593 *a study of opposite-sex twin pairs.* Am J Psychiatry, 2014. **171**(4): p. 426-35.  
40  
41 594 45. Hetrick, S.E., et al., *Early Identification and Intervention in Depressive Disorders*  
42 595 *Towards a Clinical Staging Model.* Psychotherapy and Psychosomatics, 2008. **77**(5):  
43 596 p. 263-270.  
44  
45  
46  
47  
48  
49  
50  
51  
52  
53  
54  
55  
56  
57  
58  
59  
60

- 1  
2  
3 597 46. Rice, S.M., et al., *Longitudinal sex differences of externalising and internalising*  
4  
5 598 *depression symptom trajectories: Implications for assessment of depression in men*  
6  
7 599 *from an online study*. International Journal of Social Psychiatry, 2015. **61**(3): p. 236-  
8  
9 600 240.
- 10 601 47. Wilson, S. and C.E. Durbin, *Effects of paternal depression on fathers' parenting*  
11  
12 602 *behaviors: A meta-analytic review*. Clinical Psychology Review, 2010. **30**(2): p. 167-  
13  
14 603 180.  
15  
16 604  
17  
18 605  
19  
20 606  
21  
22 607  
23  
24 608  
25  
26 609  
27  
28 610  
29  
30 611  
31  
32 612  
33  
34 613  
35  
36  
37  
38  
39  
40  
41  
42  
43  
44  
45  
46  
47  
48  
49  
50  
51  
52  
53  
54  
55  
56  
57  
58  
59  
60

For peer review only

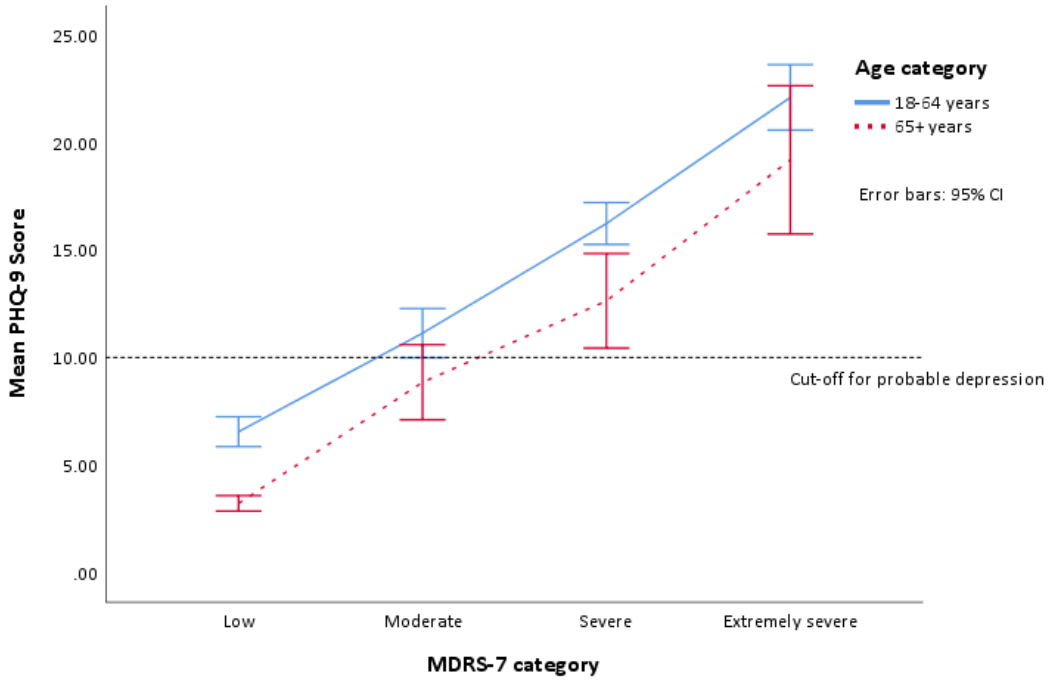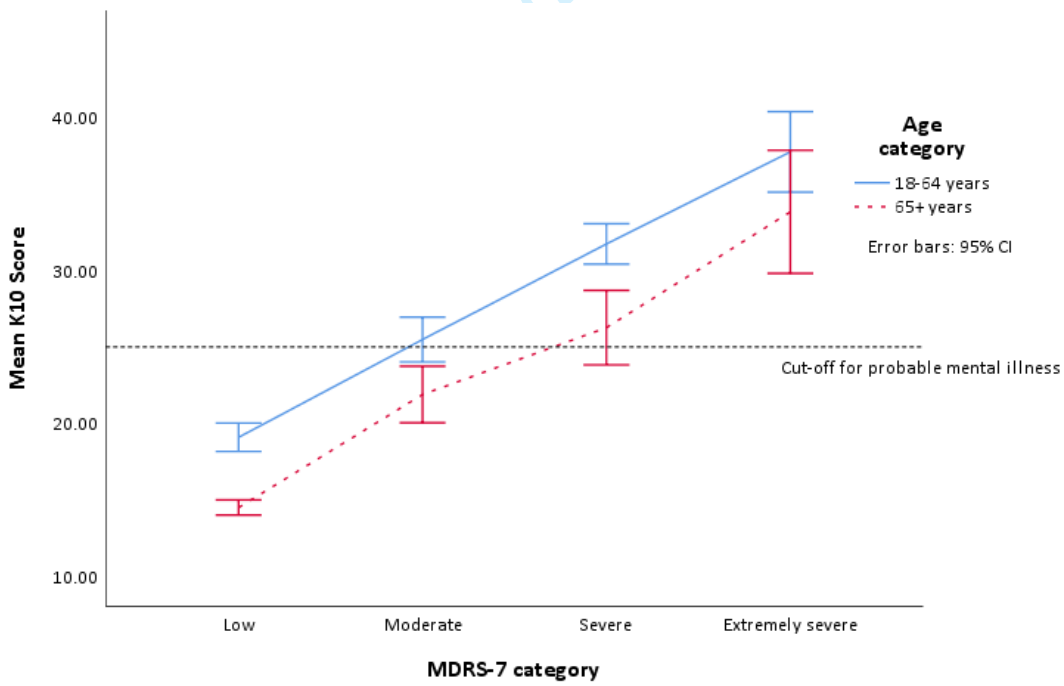

Figure 1. Effect of age and MDRS-7 category on prototypic depression symptoms (PHQ-9) and psychological distress (K10)

Supplementary Table 1. Descriptive and relational statistics for MDRS-22 items across younger and older age groups

| Domain              | Item                                                   | Younger males |           |       |                   |                    |                          |           | Older males |           |       |                   |                    |                          |           |
|---------------------|--------------------------------------------------------|---------------|-----------|-------|-------------------|--------------------|--------------------------|-----------|-------------|-----------|-------|-------------------|--------------------|--------------------------|-----------|
|                     |                                                        | <i>M</i>      | <i>SD</i> | Skew  | Total( <i>r</i> ) | Domain( <i>r</i> ) | Otherdomains( <i>r</i> ) | Itemscore | <i>M</i>    | <i>SD</i> | Skew  | Total( <i>r</i> ) | Domain( <i>r</i> ) | Otherdomains( <i>r</i> ) | Itemscore |
| Emotion Suppression | I tried to ignore feeling down                         | 1.77          | 1.12      | 0.08  | 0.61              | 0.76               | 0.49                     | 0         | 1.34        | 1.26      | 0.51  | 0.57              | 0.77               | 0.42                     | 0         |
|                     | I bottled up my negative feelings                      | 1.93          | 1.16      | 0.00  | 0.64              | 0.86               | 0.54                     | 4         | 1.28        | 1.15      | 0.58  | 0.73              | 0.86               | 0.58                     | 3         |
|                     | I covered up my difficulties                           | 1.90          | 1.18      | -0.04 | 0.64              | 0.85               | 0.50                     | 1         | 1.21        | 1.21      | 0.64  | 0.71              | 0.84               | 0.55                     | 0         |
|                     | I had to work things out by myself                     | 2.39          | 1.19      | -0.32 | 0.46              | 0.68               | 0.36                     | 1         | 1.96        | 1.36      | -0.04 | 0.58              | 0.72               | 0.40                     | 3         |
| Alcohol Use         | I drank more alcohol than usual                        | 0.80          | 1.09      | 1.23  | 0.60              | 0.89               | 0.37                     | 1         | 0.48        | 0.88      | 2.10  | 0.59              | 0.91               | 0.38                     | 0         |
|                     | I stopped feeling so bad while drinking                | 0.81          | 1.14      | 1.22  | 0.57              | 0.86               | 0.37                     | 0         | 0.39        | 0.91      | 2.51  | 0.58              | 0.88               | 0.41                     | 1         |
|                     | I needed alcohol to help me unwind                     | 0.92          | 1.16      | 1.10  | 0.60              | 0.94               | 0.37                     | 4         | 0.52        | 0.93      | 2.01  | 0.61              | 0.94               | 0.37                     | 5         |
|                     | I needed to have easy access to alcohol                | 0.54          | 0.99      | 1.92  | 0.59              | 0.87               | 0.38                     | 1         | 0.44        | 0.91      | 2.16  | 0.59              | 0.91               | 0.39                     | 0         |
| Somatic Symptoms    | I had more heartburn than usual                        | 0.60          | 0.91      | 1.48  | 0.39              | 0.65               | 0.33                     | 0         | 0.38        | 0.71      | 1.88  | 0.50              | 0.70               | 0.41                     | 0         |
|                     | I had regular headaches                                | 0.90          | 1.04      | 1.05  | 0.50              | 0.75               | 0.43                     | 0         | 0.40        | 0.79      | 2.24  | 0.54              | 0.77               | 0.43                     | 0         |
|                     | I had stomach pains                                    | 0.72          | 0.90      | 1.06  | 0.54              | 0.75               | 0.44                     | 1         | 0.38        | 0.76      | 2.32  | 0.57              | 0.77               | 0.46                     | 1         |
|                     | I had unexplained aches and pains                      | 1.05          | 1.13      | 0.79  | 0.52              | 0.78               | 0.47                     | 4         | 0.74        | 0.93      | 1.16  | 0.57              | 0.78               | 0.48                     | 6         |
| Anger & Aggression  | I overreacted to situations with aggressive behaviour  | 0.59          | 0.82      | 1.42  | 0.51              | 0.83               | 0.46                     | 2         | 0.41        | 0.70      | 1.79  | 0.56              | 0.85               | 0.50                     | 4         |
|                     | I verbally lashed out at others without being provoked | 0.28          | 0.61      | 2.53  | 0.41              | 0.77               | 0.38                     | 0         | 0.16        | 0.45      | 3.42  | 0.44              | 0.74               | 0.36                     | 0         |
|                     | I was verbally aggressive to others                    | 0.34          | 0.64      | 2.14  | 0.45              | 0.83               | 0.38                     | 0         | 0.20        | 0.49      | 2.82  | 0.41              | 0.80               | 0.33                     | 0         |
|                     | It was difficult to manage my anger                    | 0.58          | 0.84      | 1.49  | 0.56              | 0.84               | 0.50                     | 3         | 0.31        | 0.64      | 2.33  | 0.57              | 0.81               | 0.53                     | 2         |
| Drug Use            | I sought out drugs                                     | 0.32          | 0.79      | 2.63  | 0.47              | 0.94               | 0.36                     | 2         | 0.11        | 0.43      | 4.85  | 0.33              | 0.89               | 0.25                     | 1         |
|                     | I used drugs to cope                                   | 0.32          | 0.80      | 2.78  | 0.47              | 0.94               | 0.34                     | 2         | 0.07        | 0.35      | 5.59  | 0.31              | 0.82               | 0.24                     | 0         |
|                     | Using drugs provided temporary relief                  | 0.33          | 0.84      | 2.70  | 0.47              | 0.95               | 0.34                     | 4         | 0.11        | 0.44      | 4.76  | 0.39              | 0.90               | 0.31                     | 6         |
| Risk-Taking         | I drove dangerously or aggressively                    | 0.33          | 0.66      | 2.04  | 0.32              | 0.67               | 0.35                     | 0         | 0.12        | 0.37      | 3.12  | 0.32              | 0.61               | 0.29                     | 1         |
|                     | I stopped caring about the consequences of my actions  | 0.54          | 0.87      | 1.69  | 0.55              | 0.82               | 0.48                     | 3         | 0.21        | 0.59      | 3.24  | 0.54              | 0.83               | 0.49                     | 5         |
|                     | I took unnecessary risks                               | 0.38          | 0.70      | 1.94  | 0.55              | 0.84               | 0.52                     | 3         | 0.15        | 0.45      | 3.19  | 0.47              | 0.82               | 0.43                     | 0         |

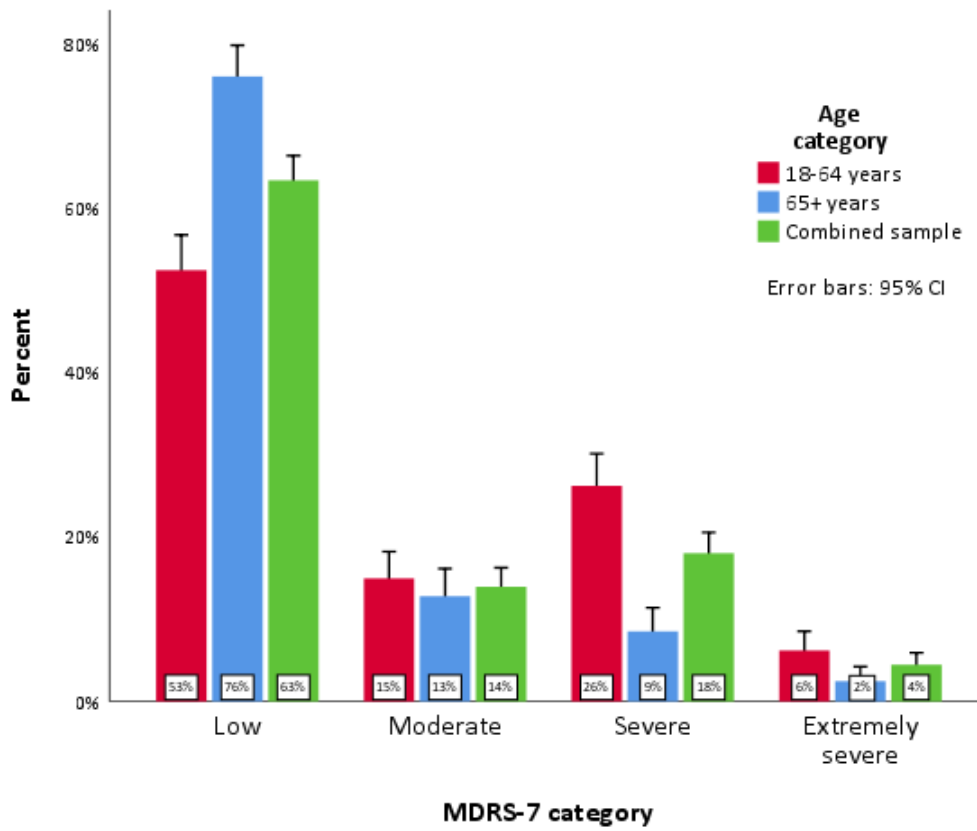

Supplementary Figure 1. Proportion of participants within MDRS-7 categories

Note. Low (0 – 5), Moderate (6 – 7), Severe (8 – 12), Extremely severe (13+).

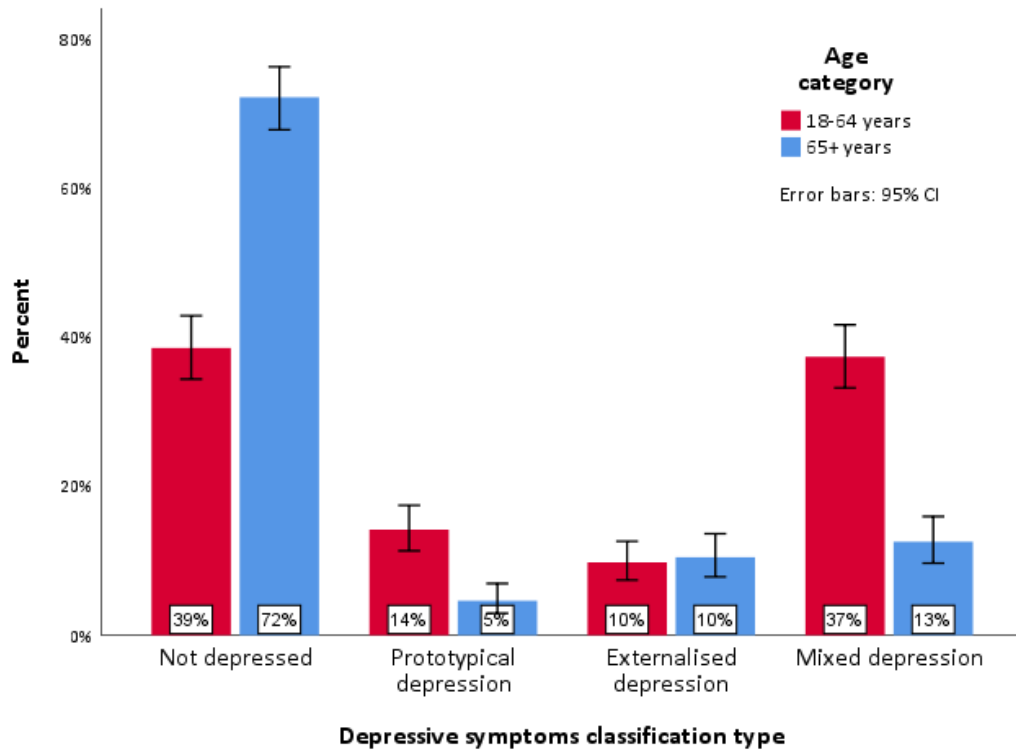

Supplementary Figure 2. Proportion of participants according to depressive symptoms classification type

# Reporting checklist for cross sectional study.

Based on the STROBE cross sectional guidelines.

## Instructions to authors

Complete this checklist by entering the page numbers from your manuscript where readers will find each of the items listed below.

Your article may not currently address all the items on the checklist. Please modify your text to include the missing information. If you are certain that an item does not apply, please write "n/a" and provide a short explanation.

Upload your completed checklist as an extra file when you submit to a journal.

In your methods section, say that you used the STROBE cross sectional reporting guidelines, and cite them as:

von Elm E, Altman DG, Egger M, Pocock SJ, Gotsche PC, Vandenbroucke JP. The Strengthening the Reporting of Observational Studies in Epidemiology (STROBE) Statement: guidelines for reporting observational studies.

|                           | Reporting Item                                                                                                      | Page Number |
|---------------------------|---------------------------------------------------------------------------------------------------------------------|-------------|
| <b>Title and abstract</b> |                                                                                                                     |             |
| Title                     | <a href="#">#1a</a> Indicate the study's design with a commonly used term in the title or the abstract              | 1           |
| Abstract                  | <a href="#">#1b</a> Provide in the abstract an informative and balanced summary of what was done and what was found | 2           |
| <b>Introduction</b>       |                                                                                                                     |             |
| Background / rationale    | <a href="#">#2</a> Explain the scientific background and rationale for the investigation being reported             | 4-6         |
| Objectives                | <a href="#">#3</a> State specific objectives, including any prespecified hypotheses                                 | 6           |
| <b>Methods</b>            |                                                                                                                     |             |



|    |                      |                      |                                                            |     |
|----|----------------------|----------------------|------------------------------------------------------------|-----|
| 1  | Study design         | <a href="#">#4</a>   | Present key elements of study design early in the paper    | 6   |
| 2  |                      |                      |                                                            |     |
| 3  | Setting              | <a href="#">#5</a>   | Describe the setting, locations, and relevant dates,       | 6   |
| 4  |                      |                      | including periods of recruitment, exposure, follow-up,     |     |
| 5  |                      |                      | and data collection                                        |     |
| 6  |                      |                      |                                                            |     |
| 7  |                      |                      |                                                            |     |
| 8  |                      |                      |                                                            |     |
| 9  | Eligibility criteria | <a href="#">#6a</a>  | Give the eligibility criteria, and the sources and methods | 6   |
| 10 |                      |                      | of selection of participants.                              |     |
| 11 |                      |                      |                                                            |     |
| 12 |                      |                      |                                                            |     |
| 13 |                      | <a href="#">#7</a>   | Clearly define all outcomes, exposures, predictors,        | 6-9 |
| 14 |                      |                      | potential confounders, and effect modifiers. Give          |     |
| 15 |                      |                      | diagnostic criteria, if applicable                         |     |
| 16 |                      |                      |                                                            |     |
| 17 |                      |                      |                                                            |     |
| 18 | Data sources /       | <a href="#">#8</a>   | For each variable of interest give sources of data and     | 6-9 |
| 19 | measurement          |                      | details of methods of assessment (measurement).            |     |
| 20 |                      |                      | Describe comparability of assessment methods if there      |     |
| 21 |                      |                      | is more than one group. Give information separately for    |     |
| 22 |                      |                      | for exposed and unexposed groups if applicable.            |     |
| 23 |                      |                      |                                                            |     |
| 24 |                      |                      |                                                            |     |
| 25 |                      |                      |                                                            |     |
| 26 |                      |                      |                                                            |     |
| 27 | Bias                 | <a href="#">#9</a>   | Describe any efforts to address potential sources of       | 6   |
| 28 |                      |                      | bias                                                       |     |
| 29 |                      |                      |                                                            |     |
| 30 |                      |                      |                                                            |     |
| 31 | Study size           | <a href="#">#10</a>  | Explain how the study size was arrived at                  | 8-9 |
| 32 |                      |                      |                                                            |     |
| 33 | Quantitative         | <a href="#">#11</a>  | Explain how quantitative variables were handled in the     | 8-9 |
| 34 | variables            |                      | analyses. If applicable, describe which groupings were     |     |
| 35 |                      |                      | chosen, and why                                            |     |
| 36 |                      |                      |                                                            |     |
| 37 |                      |                      |                                                            |     |
| 38 |                      |                      |                                                            |     |
| 39 | Statistical          | <a href="#">#12a</a> | Describe all statistical methods, including those used to  | 8-9 |
| 40 | methods              |                      | control for confounding                                    |     |
| 41 |                      |                      |                                                            |     |
| 42 |                      |                      |                                                            |     |
| 43 | Statistical          | <a href="#">#12b</a> | Describe any methods used to examine subgroups and         | 8-9 |
| 44 | methods              |                      | interactions                                               |     |
| 45 |                      |                      |                                                            |     |
| 46 |                      |                      |                                                            |     |
| 47 | Statistical          | <a href="#">#12c</a> | Explain how missing data were addressed                    | 8-9 |
| 48 | methods              |                      |                                                            |     |
| 49 |                      |                      |                                                            |     |
| 50 |                      |                      |                                                            |     |
| 51 | Statistical          | <a href="#">#12d</a> | If applicable, describe analytical methods taking          | N/A |
| 52 | methods              |                      | account of sampling strategy                               |     |
| 53 |                      |                      |                                                            |     |
| 54 |                      |                      |                                                            |     |
| 55 | Statistical          | <a href="#">#12e</a> | Describe any sensitivity analyses                          | N/A |
| 56 | methods              |                      |                                                            |     |
| 57 |                      |                      |                                                            |     |
| 58 |                      |                      |                                                            |     |
| 59 |                      |                      |                                                            |     |
| 60 |                      |                      |                                                            |     |

## Results

|    |                  |                                                                                   |                 |
|----|------------------|-----------------------------------------------------------------------------------|-----------------|
| 1  |                  |                                                                                   |                 |
| 2  |                  |                                                                                   |                 |
| 3  |                  |                                                                                   |                 |
| 4  | Participants     | <a href="#">#13a</a> Report numbers of individuals at each stage of study—        | 8-9             |
| 5  |                  | eg numbers potentially eligible, examined for eligibility,                        |                 |
| 6  |                  | confirmed eligible, included in the study, completing                             |                 |
| 7  |                  | follow-up, and analysed. Give information separately for                          |                 |
| 8  |                  | for exposed and unexposed groups if applicable.                                   |                 |
| 9  |                  |                                                                                   |                 |
| 10 |                  |                                                                                   |                 |
| 11 |                  |                                                                                   |                 |
| 12 | Participants     | <a href="#">#13b</a> Give reasons for non-participation at each stage             | N/A             |
| 13 |                  |                                                                                   |                 |
| 14 | Participants     | <a href="#">#13c</a> Consider use of a flow diagram                               | N/A             |
| 15 |                  |                                                                                   |                 |
| 16 |                  |                                                                                   |                 |
| 17 | Descriptive data | <a href="#">#14a</a> Give characteristics of study participants (eg               | 9-10            |
| 18 |                  | demographic, clinical, social) and information on                                 |                 |
| 19 |                  | exposures and potential confounders. Give information                             |                 |
| 20 |                  | separately for exposed and unexposed groups if                                    |                 |
| 21 |                  | applicable.                                                                       |                 |
| 22 |                  |                                                                                   |                 |
| 23 |                  |                                                                                   |                 |
| 24 |                  |                                                                                   |                 |
| 25 | Descriptive data | <a href="#">#14b</a> Indicate number of participants with missing data for        | 8-9             |
| 26 |                  | each variable of interest                                                         |                 |
| 27 |                  |                                                                                   |                 |
| 28 |                  |                                                                                   |                 |
| 29 | Outcome data     | <a href="#">#15</a> Report numbers of outcome events or summary                   | N/A             |
| 30 |                  | measures. Give information separately for exposed and                             |                 |
| 31 |                  | unexposed groups if applicable.                                                   |                 |
| 32 |                  |                                                                                   |                 |
| 33 |                  |                                                                                   |                 |
| 34 |                  |                                                                                   |                 |
| 35 | Main results     | <a href="#">#16a</a> Give unadjusted estimates and, if applicable,                | All estimates   |
| 36 |                  | confounder-adjusted estimates and their precision (eg,                            | are reported in |
| 37 |                  | 95% confidence interval). Make clear which                                        | Tables          |
| 38 |                  | confounders were adjusted for and why they were                                   |                 |
| 39 |                  | included all estimates are reported in tables                                     |                 |
| 40 |                  |                                                                                   |                 |
| 41 |                  |                                                                                   |                 |
| 42 |                  |                                                                                   |                 |
| 43 | Main results     | <a href="#">#16b</a> Report category boundaries when continuous variables         | 8-9             |
| 44 |                  | were categorized                                                                  |                 |
| 45 |                  |                                                                                   |                 |
| 46 |                  |                                                                                   |                 |
| 47 | Main results     | <a href="#">#16c</a> If relevant, consider translating estimates of relative risk | N/A             |
| 48 |                  | into absolute risk for a meaningful time period                                   |                 |
| 49 |                  |                                                                                   |                 |
| 50 |                  |                                                                                   |                 |
| 51 | Other analyses   | <a href="#">#17</a> Report other analyses done—e.g., analyses of                  | N/A             |
| 52 |                  | subgroups and interactions, and sensitivity analyses                              |                 |
| 53 |                  |                                                                                   |                 |
| 54 |                  |                                                                                   |                 |

## Discussion

|    |                    |                     |                                                                                                                                                                  |       |
|----|--------------------|---------------------|------------------------------------------------------------------------------------------------------------------------------------------------------------------|-------|
| 1  | Key results        | <a href="#">#18</a> | Summarise key results with reference to study objectives                                                                                                         | 12-15 |
| 2  |                    |                     |                                                                                                                                                                  |       |
| 3  |                    |                     |                                                                                                                                                                  |       |
| 4  |                    |                     |                                                                                                                                                                  |       |
| 5  | Limitations        | <a href="#">#19</a> | Discuss limitations of the study, taking into account sources of potential bias or imprecision. Discuss both direction and magnitude of any potential bias.      | 14    |
| 6  |                    |                     |                                                                                                                                                                  |       |
| 7  |                    |                     |                                                                                                                                                                  |       |
| 8  |                    |                     |                                                                                                                                                                  |       |
| 9  |                    |                     |                                                                                                                                                                  |       |
| 10 | Interpretation     | <a href="#">#20</a> | Give a cautious overall interpretation considering objectives, limitations, multiplicity of analyses, results from similar studies, and other relevant evidence. | 12-15 |
| 11 |                    |                     |                                                                                                                                                                  |       |
| 12 |                    |                     |                                                                                                                                                                  |       |
| 13 |                    |                     |                                                                                                                                                                  |       |
| 14 |                    |                     |                                                                                                                                                                  |       |
| 15 |                    |                     |                                                                                                                                                                  |       |
| 16 | Generalisability   | <a href="#">#21</a> | Discuss the generalisability (external validity) of the study results                                                                                            | 14    |
| 17 |                    |                     |                                                                                                                                                                  |       |
| 18 |                    |                     |                                                                                                                                                                  |       |
| 19 |                    |                     |                                                                                                                                                                  |       |
| 20 | <b>Other</b>       |                     |                                                                                                                                                                  |       |
| 21 | <b>Information</b> |                     |                                                                                                                                                                  |       |
| 22 |                    |                     |                                                                                                                                                                  |       |
| 23 |                    |                     |                                                                                                                                                                  |       |
| 24 | Funding            | <a href="#">#22</a> | Give the source of funding and the role of the funders for the present study and, if applicable, for the original study on which the present article is based    | N/A   |
| 25 |                    |                     |                                                                                                                                                                  |       |
| 26 |                    |                     |                                                                                                                                                                  |       |
| 27 |                    |                     |                                                                                                                                                                  |       |
| 28 |                    |                     |                                                                                                                                                                  |       |

29 None The STROBE checklist is distributed under the terms of the Creative Commons Attribution  
 30 License CC-BY. This checklist can be completed online using <https://www.goodreports.org/>, a tool  
 31 made by the [EQUATOR Network](#) in collaboration with [Penelope.ai](#)  
 32  
 33  
 34  
 35  
 36  
 37  
 38  
 39  
 40  
 41  
 42  
 43  
 44  
 45  
 46  
 47  
 48  
 49  
 50  
 51  
 52  
 53  
 54  
 55  
 56  
 57  
 58  
 59  
 60

# BMJ Open

## Brief assessment of male depression in clinical care: Validation of the Male Depression Risk Scale Short Form in a cross-sectional study of Australian men

|                                 |                                                                                                                                                                                                                                                                                                                                                             |
|---------------------------------|-------------------------------------------------------------------------------------------------------------------------------------------------------------------------------------------------------------------------------------------------------------------------------------------------------------------------------------------------------------|
| Journal:                        | <i>BMJ Open</i>                                                                                                                                                                                                                                                                                                                                             |
| Manuscript ID                   | bmjopen-2021-053650.R1                                                                                                                                                                                                                                                                                                                                      |
| Article Type:                   | Original research                                                                                                                                                                                                                                                                                                                                           |
| Date Submitted by the Author:   | 28-Dec-2021                                                                                                                                                                                                                                                                                                                                                 |
| Complete List of Authors:       | Herreen, Danielle; The University of Adelaide School of Psychology, ; Commonwealth Scientific and Industrial Research Organisation, Health & Biosecurity<br>Rice, Simon; Orygen Youth Health; The University of Melbourne Centre for Youth Mental Health<br>Zajac, Ian ; Commonwealth Scientific and Industrial Research Organisation, Health & Biosecurity |
| <b>Primary Subject Heading</b>: | Mental health                                                                                                                                                                                                                                                                                                                                               |
| Secondary Subject Heading:      | General practice / Family practice                                                                                                                                                                                                                                                                                                                          |
| Keywords:                       | Depression & mood disorders < PSYCHIATRY, PRIMARY CARE, Suicide & self-harm < PSYCHIATRY, Adult psychiatry < PSYCHIATRY                                                                                                                                                                                                                                     |
|                                 |                                                                                                                                                                                                                                                                                                                                                             |

SCHOLARONE™  
Manuscripts

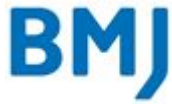

I, the Submitting Author has the right to grant and does grant on behalf of all authors of the Work (as defined in the below author licence), an exclusive licence and/or a non-exclusive licence for contributions from authors who are: i) UK Crown employees; ii) where BMJ has agreed a CC-BY licence shall apply, and/or iii) in accordance with the terms applicable for US Federal Government officers or employees acting as part of their official duties; on a worldwide, perpetual, irrevocable, royalty-free basis to BMJ Publishing Group Ltd ("BMJ") its licensees and where the relevant Journal is co-owned by BMJ to the co-owners of the Journal, to publish the Work in this journal and any other BMJ products and to exploit all rights, as set out in our [licence](#).

The Submitting Author accepts and understands that any supply made under these terms is made by BMJ to the Submitting Author unless you are acting as an employee on behalf of your employer or a postgraduate student of an affiliated institution which is paying any applicable article publishing charge ("APC") for Open Access articles. Where the Submitting Author wishes to make the Work available on an Open Access basis (and intends to pay the relevant APC), the terms of reuse of such Open Access shall be governed by a Creative Commons licence – details of these licences and which [Creative Commons](#) licence will apply to this Work are set out in our licence referred to above.

Other than as permitted in any relevant BMJ Author's Self Archiving Policies, I confirm this Work has not been accepted for publication elsewhere, is not being considered for publication elsewhere and does not duplicate material already published. I confirm all authors consent to publication of this Work and authorise the granting of this licence.

1  
2  
3  
4 1 **Brief assessment of male depression in clinical care:**  
5 2 **Validation of the Male Depression Risk Scale Short Form in a cross-sectional study of**  
6  
7 3 **Australian men**  
8  
9 4  
10 5  
11 6

12 Danielle Herreen<sup>1,2\*</sup>, Simon Rice<sup>3,4</sup>, & Ian Zajac<sup>2</sup>  
13  
14 7

15  
16 8 <sup>1</sup> School of Psychology, University of Adelaide, Adelaide, SA 5000 Australia

17  
18 9 <sup>2</sup> Health & Biosecurity, Commonwealth Scientific & Industrial Research Organisation  
19  
20 10 (CSIRO), Adelaide, SA 5000, Australia

21  
22 11 <sup>3</sup> Orygen, Parkville, VIC 3052, Australia

23  
24 12 <sup>4</sup> Centre for Youth Mental Health, The University of Melbourne, Melbourne, VIC 3052,  
25  
26 13 Australia

27  
28  
29 15 \* Corresponding author information: Danielle Herreen, School of Psychology, University of  
30  
31 16 Adelaide, Adelaide, SA 5000, Australia (email: [danielle.herreen@adelaide.edu.au](mailto:danielle.herreen@adelaide.edu.au))  
32  
33 17

34  
35 18  
36  
37 19  
38 20 **Word Count: 4170**  
39  
40 21  
41 22  
42 23  
43 24  
44 25  
45 26  
46 27  
47 28  
48 29  
49 30  
50  
51  
52  
53  
54  
55  
56  
57  
58  
59  
60

## Abstract

**Objectives:** To develop and validate a short form of the Male Depression Risk Scale (MDRS-22) for use in primary care, examining associations with prototypic depression symptoms, psychological distress, and suicidality.

**Design:** Cross-sectional study with 8-month follow-up.

**Setting:** Community-based.

**Participants:** A community sample of younger ( $n = 510$ ; 18-64 years) and older ( $n = 439$ ; 65-93 years) males residing in Australia ( $M$  age = 58.09 years,  $SD = 17.77$ ) participated in the study. A subset of respondents ( $n = 159$  younger males;  $n = 169$  older males) provided follow-up data approximately eight months later.

**Primary and secondary outcome measures:** Quantitative data were obtained through a survey comprising a range of validated measures, including the Male Depression Risk Scale (MDRS-22), the Patient Health Questionnaire (PHQ-9), and the Kessler Psychological Distress Scale (K10). The MDRS-22 was refined using exploratory and confirmatory factor analysis in line with best practice guidelines. ANOVAs and generalised linear models were conducted to explore relationships between variables.

**Results:** The short form MDRS-22 consisted of seven items (MDRS-7) and captured all of the domains in the original tool. Participants with mixed symptoms (PHQ-9  $\geq 10$  and MDRS-7  $> 5$ ) had significantly higher risk of mental illness (K10  $\geq 25$ ) and current suicidality (PHQ-9 item 9  $\geq 1$ ) than those with exclusively prototypic symptoms. Furthermore, the MDRS-7 was shown to be effective at predicting elevated symptoms of depression at follow-up, after controlling for previous depression diagnoses.

**Conclusions:** Findings provide preliminary evidence of the potential utility of the MDRS-7 as a screening tool for externalised and male-type symptoms associated with major depression in men. Field trials of the MDRS-7 in primary care settings may facilitate identification of men at risk of suicide and psychological distress who do not meet cut-off scores for existing measures of major depression symptoms.

**Key words:** depression, externalising symptoms, short form, men, lifespan, help-seeking

### 70 **Strengths and limitations of this study:**

- 71 • This is the first study to explore the psychometric properties of the MDRS-7 as a  
72 screening tool for externalised and male-type symptoms associated with major  
73 depression in men.
- 74 • Use of the MDRS-7 in primary care settings may facilitate identification of men at risk  
75 of suicide and psychological distress.
- 76 • Diagnosis of depression was not verified by clinical interview.
- 77 • Field trials of the MDRS-7 are needed to demonstrate the utility of the tool in  
78 primary care settings.

### 80 **Introduction**

81 Major depressive disorder (MDD) is a common psychiatric condition and the leading  
82 cause of disability worldwide [1, 2]. MDD is twice as prevalent in women than men [3] and  
83 severe depression is known to significantly increase the risk of suicide [4]. Although men are  
84 less likely to be diagnosed with a depressive disorder [5], they are three times more likely to  
85 die by suicide compared to women [6]. Current approaches to the diagnosis of depression  
86 (e.g., as per ICD-11 or DSM-5 diagnostic criteria) emphasise symptoms including persistent  
87 sadness, loss of interest or pleasure in previously enjoyable activities, as well as changes in  
88 affect, cognition, and neurovegetative functioning [7, 8]. However, a growing number of  
89 studies suggest that a significant proportion of men suffering from depression might  
90 experience a distinct phenotype [9-11]. Congruent with masculine role norms, this male-  
91 typical phenotype includes anger, substance misuse, emotion suppression, and risk-taking  
92 domains [10, 12]. However, these putative symptoms are not included in standard  
93 diagnostic criteria or screening measures, and it has been suggested that this might account  
94 in part for the under-diagnosis of male depression cases, and therefore under-recognition of  
95 (and treatment for) men at heightened risk of suicide [13].

96 Whilst men are often regarded as being less likely to seek help than women, recent  
97 statistics largely do not support this claim. In Australia, around 89% of men attend primary  
98 care annually [14]. Among men experiencing mental health difficulties, annual primary care  
99 attendance is similarly high with estimates of 80% to 96% of men with symptoms of



1  
2  
3 100 depression reporting a visit to primary care within the previous 12 months [15, 16].  
4  
5 101 Similarly, findings from the UK demonstrate that whilst males are overall less likely to attend  
6  
7 102 primary care compared to females, attendance rates in men and women with comparable  
8  
9 103 underlying morbidities, including depression, are similar [17]. Furthermore, findings from a  
10  
11 104 population study of healthcare contacts among Canadian suicide decedents in Toronto  
12  
13 105 demonstrated that over 60% ( $n = 1792$ ) of men who died by suicide accessed professional  
14  
15 106 mental health care in the year before their death [18]. These findings highlight the essential  
16  
17 107 role of primary care physicians in identifying depression and suicide risk in men in order to  
18  
19 108 facilitate effective treatment [19].

20 109 Growing interest in gender-sensitive assessment of men's depression has seen the  
21  
22 110 development of male-specific screening tools to identify symptoms that align with men's  
23  
24 111 socialisation and gender norm processes [e.g., 20, 21, 22]. One recently developed and  
25  
26 112 widely validated measure for assessing externalising and male-type symptoms in men is the  
27  
28 113 Male Depression Risk Scale (MDRS-22) [23]. The MDRS-22 consists of 22 items assessing six  
29  
30 114 symptom domains including emotion suppression, drug use, alcohol use, anger and  
31  
32 115 aggression, somatic symptoms, and risk-taking [23]. Recently, Zajac and colleagues [24]  
33  
34 116 demonstrated that this tool, used in conjunction with a measure of prototypic depression  
35  
36 117 symptoms (PHQ-9), was able to stratify men into three distinct risk groups: (i) prototypic  
37  
38 118 symptoms (consistent with current MDD diagnostic criteria), (ii) externalising symptoms  
39  
40 119 consistent with masculine socialisation, and (iii) mixed depressive symptoms, reflecting both  
41  
42 120 internalised and externalised symptomology. Further analyses showed that men in the  
43  
44 121 externalising only group—men who are arguably missed when using measures of  
45  
46 122 internalising symptoms—were at significantly increased risk of suicide compared to non-  
47  
48 123 depressed men. Moreover, those with elevated externalised and prototypic symptomology  
49  
50 124 were at highest risk of mental illness as well as suicide [24], highlighting the potential early  
51  
52 125 identification and intervention benefits of leveraging male-specific tools in primary care  
53  
54 126 settings.

55 127 Two-stage screening methods are commonly used in primary care, and have been  
56  
57 128 shown to be effective for increasing the recognition of depression [25]. However, many  
58  
59 129 primary care physicians report that time is a limiting factor in their capacity to  
60

1  
2  
3 130 comprehensively assess psychological issues, including depression [19, 26], despite  
4  
5 131 management of common mental disorders rating as a top reason for general practice  
6  
7 132 attendance [27]. To help address this issue, brief screening tools consisting of 15 items or  
8  
9 133 less are often used, given their completion time is usually just a couple of minutes [28].  
10  
11 134 Examples include the Patient Health Questionnaire (PHQ-9) [29], the Kessler Psychological  
12  
13 135 Distress Scale (K10) [30], and the Beck Depression Inventory for Primary Care (BDI-PC) [31].

14 136 To date, the MDRS-22 has demonstrated excellent psychometric properties as well  
15  
16 137 as the ability to detect different groups of men who may be at increased risk of suicide and  
17  
18 138 mental illness [e.g., 24, 32, 33]. However, given time constraints in primary care settings, the  
19  
20 139 length of the current MDRS-22 is arguably impractical [12]. The purpose of the present  
21  
22 140 study was to develop a short form of the MDRS-22 to facilitate its use as a screening tool in  
23  
24 141 busy and time-pressured health care settings. We also aimed to establish an initial set of  
25  
26 142 cut-off scores for interpretive purposes. If the MDRS short form is to have clinical utility, it  
27  
28 143 needs to be able to identify broader aspects of psychopathology. Thus, a secondary aim was  
29  
30 144 to explore current and longitudinal risk of suicidality and mental illness by adopting a  
31  
32 145 previously utilised categorisation according to cut-off scores on the MDRS and the widely  
33  
34 146 used PHQ-9, which assesses prototypic depression symptoms [24]. Furthermore, as  
35  
36 147 adherence to masculine gender norms has been found to decline as men get older [34],  
37  
38 148 younger and older males were examined separately to examine the utility of the tool across  
39  
40 149 age groups.

## 150 151 **Method**

### 152 **Participants and procedure**

153 This cross-sectional study included baseline data from a community sample of 510  
154 younger males aged 18 to 64 years ( $M = 45.43$ ,  $SD = 14.56$ ) and 439 older males aged 65 to  
155 93 years ( $M = 72.79$ ,  $SD = 5.88$ ). A subset of respondents ( $n = 159$  younger males;  $n = 169$   
156 older males) participated in the follow-up component. On average, 35 weeks ( $M = 248.56$   
157 days,  $SD = 24.59$  days) elapsed between the provision of Time 1 and Time 2. The mean age  
158 for the overall sample was 58.09 years ( $SD = 17.77$ ). Eligible participants were Australian  
159 male residents over the age of 18 years who considered themselves fluent in English.

1  
2  
3 160 Participants were recruited via paid advertisements displayed to Australian members of the  
4  
5 161 Facebook social networking site ( $n = 601$ ; 63.3%) and through promotion of the study to  
6  
7 162 community organisations (e.g., Rotary, Men's Shed). Time 1 data were collected between  
8  
9 163 August and November 2019 using an online questionnaire. However, participants from local  
10  
11 164 community organisations were provided with the option to complete a paper version of the  
12  
13 165 survey to ensure inclusivity and accessibility of the sample and  $n = 5$  participants completed  
14  
15 166 a paper version. Ethics approval was obtained from the University of Adelaide Human  
16  
17 167 Research Ethics Committee and the CSIRO Health and Medical Human Research Ethics  
18  
19 168 Committee (approval number H-2019-109). All participants provided informed consent.  
20  
21 169 Reporting adhered to the STROBE cross-sectional guidelines. Table 1 presents a summary of  
22  
23 170 the characteristics of the study participants at Time 1 and Time 2.  
24

## 171 172 **Public involvement**

173 Participants were not involved in the design or conduct of this research; however,  
174 participants could nominate to receive updates on the results of the study.  
175

## 176 **Measures**

### 177 178 ***Demographics***

179 Participants reported their age, gender, relationship status, employment status, level  
180 of education, and household income. They also reported whether they had previously been  
181 diagnosed with depression.  
182

### 183 ***Male Depression Risk Scale (MDRS-22)***

184 Externalising and male-type depression symptoms were assessed by the Male  
185 Depression Risk Scale (MDRS-22) [23]. The MDRS-22 contains twenty-two self-report items  
186 designed to assess six broad domains of externalising and male-type depression symptoms  
187 present in the last month including anger and aggression, drug use, alcohol use, emotion  
188 suppression, risk-taking, and somatic symptoms using the response format of 5-point Likert  
189 scale ranging from 0 (*none of the time*), 1 (*a little of the time*), 2 (*some of the time*), 3 (*most*

1  
2  
3 190 *of the time*), and 4 (*all of the time*). Cronbach's alphas for the MDRS are reported in Table 2  
4  
5 191 for both age groups and for the overall sample and are considered adequate.  
6  
7 192

### 9 193 ***The Patient Health Questionnaire (PHQ-9)***

10 194 The Patient Health Questionnaire (PHQ-9) [29] is a self-report depression screening  
11  
12 195 tool for use in primary care that assesses nine symptoms consistent with the DSM-5  
13  
14 196 diagnostic criteria for major depressive disorder [7]. Participants endorse how often they  
15  
16 197 have experienced each symptom (e.g., "*Feeling down, depressed, or hopeless*") during the  
17  
18 198 preceding two-week period using a 4-point Likert scale ranging from 0 (*not at all*) to 3  
19  
20 199 (*almost every day*). A score of 10 and above is indicative of clinically significant depressive  
21  
22 200 symptoms [35]. In addition to utilising total PHQ-9 scores, we used item 9 as a measure of  
23  
24 201 suicidality: "Over the past two weeks, how often have you been bothered by thoughts that  
25  
26 202 you would be better off dead, or of hurting yourself in some way?". We deemed those who  
27  
28 203 scored 1 or more on this item to be currently experiencing suicidal ideation. Internal  
29  
30 204 consistency of the PHQ-9 in the present study for the overall sample was high ( $\alpha = .93$ ).  
31  
32 205

### 32 206 ***Kessler Psychological Distress Scale (K10)***

33 207 The Kessler Psychological Distress Scale (K10) [30] is a widely used measure in both  
34  
35 208 research and primary care settings [36]. It comprises ten questions assessing a person's  
36  
37 209 negative emotional state in the preceding 30 days (e.g., "*About how often did you feel so*  
38  
39 210 *nervous that nothing could calm you down*"). Responses are based on a 5-point Likert scale  
40  
41 211 ranging from 1 (*none of the time*) to 5 (*all of the time*). In addition to examining K10 total  
42  
43 212 scores, we created a binary variable with scores  $\geq 25$  indicating probable mental illness,  
44  
45 213 consistent with published cut-off scores for the K10 [37]. Internal consistency of the K10 in  
46  
47 214 this study for the overall sample was high ( $\alpha = .95$ ).  
48  
49 215

### 50 216 **Analytic sample**

51 217 A total of 1114 participants commenced the study. However, 156 participants were  
52  
53 218 not included in the analyses due to substantial missing data. Thus,  $N = 949$  participants who  
54  
55 219 provided complete data for the items comprising the MDRS-22 were included in the item  
56  
57  
58  
59  
60

220 reduction process described below. Of this sample,  $n = 29$  did not provide complete data for  
221 the PHQ-9 or K10 items. Thus, models using these variables comprised  $n = 920$  participants.

222

### 223 **Statistical analyses**

224 Data for the present study were analysed using IBM SPSS Statistics (Version 26.0)  
225 except for the confirmatory factor analysis (CFA) undertaken in JASP [Version 0.13.1; 38].  
226 Various recommendations exist for the selection of items for short-form surveys including  
227 both Rasch analysis [39] and descriptive approaches [40, 41]. Broadly speaking, the focus is  
228 on selecting items with maximum variability and which retain the theorised underlying  
229 construct—as well as sub-domains—measured by the long-form scale. Therefore, we  
230 calculated descriptive (means, standard deviation (*SD*), and skewness) and relational  
231 statistics (correlations) for each item (see Supplementary Table 1). Items were then scored  
232 based on each statistic within its corresponding domain (i.e., largest *SD*, strongest  
233 correlation etc) and summed across the different descriptive indices to derive a total  
234 performance score for each item. Parallel Analysis consisting of 1,000 permutations of the  
235 original raw data was used to determine thresholds for retaining factors. Exploratory factor  
236 analysis (EFA) of the best performing items was performed with maximum likelihood  
237 estimation within each age group, and in the combined sample. Stability of this solution was  
238 then established using CFA of Time 2 Data ( $n = 328$ ). Fit indices reported include:  
239 comparative fit index (CFI); the Tucker-Lewis index (TLI); the root mean square error of  
240 approximation (RMSEA); and the standardised root mean residual (SRMR). Interpretation of  
241 these indices were guided by the recommendations of Hu & Bentler [42].

242 In order to investigate the clinical utility of the reduced item scale, cut-off scores  
243 were determined for Low (0 – 5), Moderate (6 – 7), Severe (8 – 12) and Extremely severe  
244 (13+) symptom severity groups. The corresponding cumulative percentiles (cum%) at the  
245 upper boundaries of these categories were: Low (cum% = 63.5), Moderate (cum% = 77.5%),  
246 Severe (cum% = 95.5), Extremely severe (cum% = 100.0). These category scores were  
247 determined using previously reported cumulative percentiles that represented differing  
248 degrees of increased risk of recent suicide attempt for the MDRS-22 [33]. A 2x2 ANOVA was  
249 conducted to explore the effect of age group differences and MDRS-7 symptom categories

1  
2  
3 250 on prototypic depression (PHQ-9) and psychological distress (K10). We classified individuals  
4  
5 251 into depression groups using the MDRS-7 in combination with the PHQ-9 based on previous  
6  
7 252 research [24] with groups referred to as: not depressed (PHQ-9 < 10 and MDRS-7 ≤ 5),  
8  
9 253 prototypic depression features (PHQ-9 ≥ 10 and MDRS-7 ≤ 5), mixed features (PHQ-9 ≥ 10  
10  
11 254 and MDRS-7 > 5), and externalising and male-type features (PHQ-9 < 10 and MDRS-7 > 5). In  
12  
13 255 addition, we used the K10 to determine those individuals suffering a moderate mental  
14  
15 256 illness (K10 ≥ 25) from those without a mental illness (K10 < 25), and current suicidality was  
16  
17 257 ascribed based on scores ≥ 1 on PHQ-9 item 9: “Over the past two weeks, how often have  
18  
19 258 you been bothered by thoughts that you would be better off dead, or of hurting yourself in  
20  
21 259 some way?”. Based on these classifications, generalised linear models (GLMs) were used to  
22  
23 260 determine risk of mental illness and suicidality based on depressive symptom groupings  
24  
25 261 whilst controlling for previous diagnosis of depression. An additional GLM examined risk of  
26  
27 262 depression at Time 2 (PHQ-9 ≥ 10) as a function of MDRS-7 categories at Time 1.  
28  
29 263 Assumptions of GLMs were considered through inspection of scatter plots and histograms of  
30  
31 264 residuals and predicted values, with model results reported as standardised betas.  
32  
33 265

## 32 266 **Results**

### 34 267 *Sample characteristics*

36 268 Table 1 presents the characteristics of the participants at Time 1 and Time 2. As  
37  
38 269 expected, there was a higher proportion of older participants who reported themselves as  
39  
40 270 married/de-facto or widowed/divorced/separated, in comparison to younger men.  
41  
42 271 Regarding education, the majority of older participants completed year 11 or below, whilst  
43  
44 272 the proportion of participants completing a Bachelor’s degree was higher in the younger  
45  
46 273 sample. In addition, household income appeared to be higher in younger compared to older  
47  
48 274 men, consistent with the majority of the older sample reporting themselves as being retired.  
49  
50 275 Comparisons with 2016 Australian Census data indicate that participants in the current  
51  
52 276 study were more likely to be married or in a de-facto relationship (63.1% vs 58.1%), more  
53  
54 277 likely to have completed a Bachelor Degree level or above (49.8% vs 22.0%), and less likely  
55  
56 278 to be employed full-time (44.5% vs 57.7%) compared to the Australian population [43]. This  
57  
58 279 likely reflects the trend towards older males in the current study. Sample characteristics at

1  
2  
3 280 Time 1 and Time 2 were mostly comparable, with a higher proportion of participants at  
4  
5 281 Time 2 retired.  
6  
7 282  
8  
9 283

10  
11 284 -----  
Insert Table 1 about here  
12  
13 285 -----  
14  
15 286

16 287 *Item reduction*

17  
18 288 Descriptive and relational statistics for each of the MDRS-22 items across younger  
19  
20 289 and older age groups are displayed in Supplementary Table 1. For the emotion suppression,  
21  
22 290 alcohol use, somatic symptoms, and drug use domains, a single highest scoring item  
23  
24 291 emerged congruent across age groups. For the anger and aggression domain, two different  
25  
26 292 items were retained because of their performance across the age groups. Finally, although  
27  
28 293 two risk-taking items scored equally well in the younger group, only one of these loaded  
29  
30 294 within the older age group, and only this item was retained. This resulted in a total selection  
31  
32 295 of seven items for the short form scale covering all of the original MDRS-22 domains.

33 296 Factor analysis of these seven items revealed the presence of a single underlying  
34  
35 297 domain that satisfied criteria determined by the parallel analysis; eigenvalues were required  
36  
37 298 to exceed 1.16. As shown in Table 2, all items demonstrated a moderate-to-strong loading  
38  
39 299 on a single underlying factor except for those measuring alcohol and drug use, which loaded  
40  
41 300 moderately. When modelling these 7-items using CFA at Time 2, the initial solution  
42  
43 301 specifying all items loading on a single latent MDRS-7 factor was not quite adequate [ $\chi^2(14)$   
44  
45 302 = 65.85  $p < .001$ , CFI = 0.96, TLI = 0.94, RMSEA = 0.11 (0.08, 0.13), SRMR = 0.10]. However,  
46  
47 303 allowing the errors of the two items assessing anger and physical aggression to covary  
48  
49 304 resulted in acceptable model fit [ $\chi^2(13) = 29.04 p \leq .01$ , CFI = 0.99, TLI = .98, RMSEA = 0.06  
50  
51 305 (0.03, 0.09), SRMR = 0.09].  
52  
53 306 -----

54  
55 307 Insert Table 2 about here  
56  
57 308 -----  
58  
59 309

1  
2  
3 310 *Cut-off scores for the short scale*  
4

5 311 The proportion of men in each of the different MDRS-7 symptom severity categories  
6  
7 312 are shown in Supplementary Figure 1 for the total sample, and by age group. As can be  
8  
9 313 seen, older men appear more likely to be in the 'low' category of symptoms, and less likely  
10  
11 314 to be in the 'severe' or 'extremely severe' categories compared to younger males. Figure 1  
12  
13 315 shows the effect of age and MDRS-7 categories on prototypic depression (PHQ-9) and  
14  
15 316 psychological distress (K10). For PHQ-9, there were significant differences between all  
16  
17 317 MDRS-7 groups [ $F(3, 912) = 208.05, p < .001$ ] and between age groups [ $F(1, 912) = 26.76, p <$   
18  
19 318  $.001$ ], with no significant interaction between MDRS-7 and age [ $F(3, 912) = 0.59, p = .625$ ].  
20  
21 319 For the K10, results were similar: significant differences between all MDRS-7 groups [ $F(3,$   
22  
23 320  $912) = 188.95, p < .001$ ] and between younger and older men [ $F(3, 912) = 33.05, p < .001$ ],  
24  
25 321 but no interaction between MDRS-7 and age [ $F(3, 912) = 0.44, p = .719$ ].  
26  
27 322

27 323 -----  
28  
29 324 Insert Figure 1 about here  
30  
31 325 -----  
32  
33 326

34 327 *Clinical utility of the MDRS-7*  
35

36 328 The proportion of males according to depressive classification type is shown in  
37  
38 329 Supplementary Figure 2. Externalised and male-type depression affected approximately 10%  
39  
40 330 of younger and older males, whilst prototypic and mixed depressive symptoms were more  
41  
42 331 common in younger males. Table 3 shows the risk of mental illness and suicidality compared  
43  
44 332 to non-depressed participants within each age group after controlling for a previous  
45  
46 333 diagnosis of depression. All classifications were associated with both outcome measures.  
47  
48 334 Individuals with mixed symptoms have the highest risk of suicidality and mental illness.  
49  
50 335

51 336 -----  
52  
53 337 Insert Table 3 about here  
54  
55 338 -----  
56  
57 339



1  
2  
3 340 A final GLM considered the likelihood of being classified as depressed at follow-up  
4  
5 341 based on responses to the PHQ-9 at Time 2 (i.e., score  $\geq 10$ ). MDRS-7 category was entered  
6  
7 342 as a predictor controlling for PHQ-9 scores at Time 1, previous diagnosis of depression and  
8  
9 343 age. As shown in Table 4, PHQ scores at Time 1 were significantly associated with increased  
10  
11 344 risk of depression at Time 2 although age and prior diagnoses were not significantly  
12  
13 345 associated. Those classified as having moderate MDRS-7 symptoms at Time 1 were  
14  
15 346 significantly more likely than those in the low symptom category to be classified as  
16  
17 347 depressed at Time 2, whilst the severe and extremely severe categories were not associated  
18  
19 348 with increased risk.  
20  
21 349  
22 350 -----  
23 351

24 351 Insert Table 4 about here  
25 352 -----  
26 352

## 27 353 Discussion

29 354 Clinical reports and emergent empirical work suggest that men's depression may be  
30  
31 355 under-detected as a result of prototypic screening tools that may be insensitive to men's  
32  
33 356 gender role socialisation [11, 13, 44]. The Male Depression Risk Scale (MDRS-22) assesses  
34  
35 357 externalised and male-type symptoms of depression, such as substance misuse, risk-taking,  
36  
37 358 and anger. However, in its current 22-item form, it is impractical for rapid use in primary  
38  
39 359 care, particularly when used alongside traditional depression screening tools [12]. The  
40  
41 360 present research aimed to derive a short form of the MDRS-22, examine its psychometric  
42  
43 361 properties and relationships with psychological distress, depression, and suicidal ideation in  
44  
45 362 order to demonstrate its utility as a potential screening tool in primary and other health  
46  
47 363 care settings.

47 364 The short form derived herein comprises seven items, representing 1 item for each  
48  
49 365 of the original MDRS domains including emotion suppression, risk-taking, substance use,  
50  
51 366 drug use, somatic symptoms, and two items for the anger and aggression domain, based on  
52  
53 367 criteria including variability within items, the item's relationship to its original MDRS domain  
54  
55 368 but also with the overall MDRS score. Of particular importance is our finding that the  
56  
57 369 correlation between the MDRS-7 and the original MDRS-22 was near perfect ( $r = .94$ ). Five

1  
2  
3 370 of the seven items demonstrated moderate-to-strong loadings on a single underlying  
4  
5 371 construct presumed to reflect the male depression phenotype, whilst two items assessing  
6  
7 372 alcohol and drug use loaded moderately. This likely reflects the reduced variability of  
8  
9 373 participant responses on these items, with most participants reporting that these items  
10  
11 374 applied to them none, or a little of the time. However, these loadings still exceeded the  
12  
13 375 minimum recommended factor loading of .32 [45]. In addition, items that tap these  
14  
15 376 behaviours are important to retain given that substance use is an important marker of  
16  
17 377 depression and suicidality in men and particularly those who adhere to masculine norms  
18  
19 378 [44, 46]. It is nonetheless important to note that substance use may reflect a comorbidity  
20  
21 379 [47] or maladaptive coping [48]. These are important questions for future research to  
22  
23 380 explore.

23 381 In the present study, externalising and male-type symptoms, either alone or in  
24  
25 382 combination with prototypic symptoms, were found to be more common than exclusively  
26  
27 383 prototypic symptoms. Approximately 10% of younger and older males were found to  
28  
29 384 present with uniquely externalising and male-type symptoms, whilst 38% of younger males  
30  
31 385 and 13% of older males presented with mixed symptoms. These findings are consistent with  
32  
33 386 previous research using the MDRS-22 [24] and highlight the potential utility of the MDRS-7  
34  
35 387 for detecting additional cases of men at risk. Men with exclusively externalised and male-  
36  
37 388 type depression are a subset who score below threshold on traditional prototypic measures  
38  
39 389 but whom report a degree of externalised behaviours that might be problematic.  
40  
41 390 Furthermore, both younger and older males in the mixed symptom group had increased risk  
42  
43 391 of a mental illness—after controlling for a previous diagnosis of depression—demonstrating  
44  
45 392 unequivocally that this represents a unique group of psychologically distressed, at-risk men.  
46  
47 393 Similarly, both younger and older males in the mixed symptom group had a significantly  
48  
49 394 elevated risk of suicidality. These findings are consistent with research by Zajac and  
50  
51 395 colleagues [24] and highlight the clinical importance of considering a broad range of  
52  
53 396 potential presentations of depression in men, all of which are associated with increased risk  
54  
55 397 of poor outcomes.

54 398 The MDRS-7 was also shown to be effective at predicting depression at a later time  
55  
56 399 point, suggesting a possible prodromal effect. These findings are consistent with those by  
57  
58  
59  
60

1  
2  
3 400 Kendler and colleagues [49] who demonstrated that externalising and male-type symptoms  
4  
5 401 predicted a future depressive episode in men. Hence, our findings may reflect early  
6  
7 402 symptom expression, or even attempts of men to cope with what has the potential to  
8  
9 403 develop into a threshold depressive disorder. This further highlights the potential value of  
10  
11 404 screening for externalising and male-type symptoms to facilitate early intervention and  
12  
13 405 prevention of further mental health issues [50]. In addition, given the externalised nature of  
14  
15 406 male-typical symptoms of depression, it is important to note that these symptoms not only  
16  
17 407 affect men's health and wellbeing but also the health wellbeing of their families, friends,  
18  
19 408 and communities [13, 51, 52]. Hence the better identification and management of male  
20  
21 409 depression is likely to have substantial public health implications.  
22  
23 410

### 23 411 **Clinical implications**

24  
25 412 There is an urgent need for health services and providers to utilise more sensitive  
26  
27 413 diagnostic tools as a means of improving the detection of depression and psychological  
28  
29 414 distress in males and addressing the high rates of male suicide [13]. The use of brief tools  
30  
31 415 such as the MDRS-7 may assist with detecting unique cases of men who would score below  
32  
33 416 threshold on measures such as the PHQ-9. However, an added benefit of using this scale  
34  
35 417 alongside prototypic measures, is the ability to detect men presenting with mixed  
36  
37 418 symptomology whose risk of suicide and poor mental health outcomes is significantly  
38  
39 419 elevated. Therefore, the clinical utility of this measure may extend beyond screening and  
40  
41 420 detection and into the therapy setting where it is necessary to determine, monitor, and  
42  
43 421 manage differing degrees of suicidality.  
44  
45 422

### 45 423 **Limitations and suggestions for future research**

46  
47 424 The methodology adopted in this study is not without limitations. The majority of  
48  
49 425 participants were recruited online, which may limit the generalisability of the findings to  
50  
51 426 other populations [53]. Future research should examine measurement invariance according  
52  
53 427 to factors such as education level, income, and cultural background. There was also a trend  
54  
55 428 towards older males in the current sample. However, items retained in the MDRS-7 were  
56  
57 429 those that performed best in both younger and older males to ensure the measure was  
58  
59  
60

1  
2  
3 430 appropriate across the lifespan. Future research should examine the psychometric  
4  
5 431 properties of the MDRS-7 with additional populations, including clinical samples of men  
6  
7 432 across the lifespan presenting to primary care. In addition, as data was self-report, diagnosis  
8  
9 433 of depression could not be verified at clinical interview. The results of this study would be  
10  
11 434 strengthened by a more rigorous assessment of psychopathology and comorbidity. It is also  
12  
13 435 important to acknowledge that this study used a single item from the PHQ-9 to examine  
14  
15 436 current suicidal ideation. Therefore, there is a need for additional research to examine the  
16  
17 437 relationship between the MDRS-7 and other measures of suicidality, including recent suicide  
18  
19 438 attempt.

20 439

## 21 440 **Conclusion**

22  
23 441 The present study provides important preliminary information on the development  
24  
25 442 and validation of the MDRS-7. Specifically, this study provides emerging support for the  
26  
27 443 validity and reliability of the MDRS-7 as a measure of externalising and male-type  
28  
29 444 depression symptoms in both younger and older men in terms of its psychometric  
30  
31 445 properties as well as its relationship to prototypic depression symptoms, psychological  
32  
33 446 distress, and suicidality. Use of male-specific measures of depression such as the MDRS-7  
34  
35 447 may improve the detection of depression and suicide risk in men, and adjunctive use  
36  
37 448 (alongside established prototypic scales such as the PHQ-9) may contribute to improved  
38  
39 449 public health outcomes.

40 450

## 41 451 **Acknowledgements**

42 452 The authors thank all participants for contributing to this study. The authors would also like  
43  
44 453 to acknowledge Lynn Ward for her valuable suggestions on earlier drafts of the manuscript.

## 45 454 **Author contributions**

46  
47  
48  
49 455 D.H., S.R., and I.Z. developed the study concept. D.H. and I.Z. performed the data analyses.  
50  
51 456 D.H. drafted the paper and S.R. and I.Z. provided critical revisions. All authors approved the  
52  
53 457 final version of the paper for submission.

54 458

Table 1. Sociodemographic characteristics of participants

| Variable                          | Younger men (< 65)  |                     | Older men (≥ 65)    |                     |
|-----------------------------------|---------------------|---------------------|---------------------|---------------------|
|                                   | Time 1<br>(n = 510) | Time 2<br>(n = 159) | Time 1<br>(n = 439) | Time 2<br>(n = 169) |
| Age range                         | 18-64               |                     | 65-93               |                     |
| Age, <i>M</i> ( <i>SD</i> )       | 45.43 (14.56)       |                     | 72.79 (5.88)        |                     |
| Relationship status, <i>n</i> (%) |                     |                     |                     |                     |
| Single (never married)            | 118 (23.1)          | 27 (17.0)           | 12 (2.7)            | 6 (3.6)             |
| Widowed/divorced/separated        | 68 (13.3)           | 19 (11.9)           | 92 (21.0)           | 44 (26.0)           |
| Married/de-facto                  | 322 (63.1)          | 113 (71.1)          | 332 (75.6)          | 119 (70.4)          |
| Prefer not to say                 | 2 (0.4)             | 0 (0.0)             | 3 (0.7)             | 0 (0.0)             |
| Employment status, <i>n</i> (%)   |                     |                     |                     |                     |

#### 459 Funding

460 D.H. is supported by an Australian Government Research Training Program Scholarship and  
 461 a CSIRO Supplementary Scholarship. S.R. is supported by an NHMRC Career Development  
 462 Fellowship (GNT1158881) from the Australian Government. These funding bodies had no  
 463 influence on the design of the study and collection, analysis, or interpretation of data or in  
 464 writing the manuscript.

465

#### 466 Ethics approval

467 Ethics approval was obtained from the University of Adelaide Human Research Ethics  
 468 Committee and the CSIRO Health and Medical Human Research Ethics Committee (approval  
 469 number H-2019-109). All participants provided informed consent.

470

#### 471 Competing interests

472 The authors declare that they have no competing interests.

473

#### 474 Data sharing statement

475 Data is available upon reasonable request.

476

477

478

479

480

481

482

483

484

485

486

487

|                                          |            |           |            |            |
|------------------------------------------|------------|-----------|------------|------------|
| Employed full-time                       | 227 (44.5) | 66 (41.5) | 22 (5.0)   | 5 (3.0)    |
| Employed part-time                       | 37 (7.3)   | 11 (6.9)  | 18 (4.1)   | 4 (2.4)    |
| Employed casually                        | 67 (13.1)  | 19 (11.9) | 14 (3.2)   | 5 (3.0)    |
| Not employed or unpaid work              | 94 (18.4)  | 24 (15.1) | 13 (3.0)   | 7 (4.1)    |
| Retired                                  | 73 (14.3)  | 39 (24.5) | 370 (84.3) | 148 (87.6) |
| Prefer not to say                        | 12 (2.4)   | 0 (0.0)   | 2 (0.5)    | 0 (0.0)    |
| Household income, <i>n</i> (%)           |            |           |            |            |
| <\$35,000                                | 136 (26.7) | 28 (17.6) | 141 (32.1) | 51 (30.2)  |
| \$35,000-\$65,000                        | 91 (17.8)  | 32 (20.1) | 156 (35.5) | 55 (32.5)  |
| \$65,000-\$105,000                       | 100 (19.6) | 44 (27.7) | 80 (18.2)  | 29 (17.2)  |
| \$105,000-\$160,000                      | 97 (19.0)  | 26 (16.4) | 31 (7.1)   | 15 (8.9)   |
| >\$160,000                               | 65 (12.7)  | 20 (12.6) | 12 (2.7)   | 4 (2.4)    |
| Prefer not to say                        | 21 (4.1)   | 9 (5.7)   | 19 (4.3)   | 15 (8.9)   |
| Highest level of education, <i>n</i> (%) |            |           |            |            |
| Year 11 or below                         | 49 (9.6)   | 11 (6.9)  | 81 (18.5)  | 23 (13.6)  |
| Year 12                                  | 52 (10.2)  | 10 (6.3)  | 48 (10.9)  | 17 (10.1)  |
| Certificate/diploma                      | 154 (30.2) | 55 (34.6) | 133 (30.3) | 50 (29.6)  |
| Bachelor's degree                        | 139 (27.3) | 44 (27.7) | 74 (16.9)  | 34 (20.1)  |
| Graduate certificate/diploma             | 43 (8.4)   | 15 (9.4)  | 39 (8.9)   | 20 (11.8)  |
| Postgraduate degree                      | 72 (14.1)  | 23 (14.5) | 56 (12.8)  | 22 (13.0)  |
| Prefer not to say                        | 1 (0.2)    | 1 (0.6)   | 8 (1.8)    | 3 (1.8)    |

*Note.* % may not equal 100% due to rounding.

480

481

482

483

484 Table 2. Item loadings derived from exploratory factor analysis (maximum likelihood estimation)

| Domains             | Items                                                 | 18-64       | 65+         | Overall     | Time 2 |
|---------------------|-------------------------------------------------------|-------------|-------------|-------------|--------|
| Emotion Suppression | I bottled up my negative feelings                     | .67         | .72         | .71         | .68    |
| Alcohol Use         | I needed alcohol to help me unwind                    | .44         | .45         | .48         | .37    |
| Somatic Symptoms    | I had unexplained aches and pains                     | .56         | .59         | .58         | .63    |
| Aggression          | I overreacted to situations with aggressive behaviour | .69         | .74         | .71         | .30    |
| Anger               | It was difficult to manage my anger                   | .75         | .74         | .75         | .65    |
| Drug Use            | Using drugs provided temporary relief                 | .36         | .44         | .42         | .44    |
| Risk-Taking         | I stopped caring about the consequences of my actions | .63         | .62         | .65         | .80    |
|                     | <i>Eigenvalue</i>                                     | 2.52        | 2.74        | 2.72        |        |
|                     | <i>Variance explained (%)</i>                         | 36.04       | 39.08       | 38.82       |        |
|                     | <i>Cronbach's alpha</i>                               | .68         | .71         | .72         |        |
|                     | <i>Correlation with MDRS-22</i>                       | .94         | .94         | .94         |        |
|                     | <i>Short form re-test reliability</i>                 | .72         | .69         | .71         |        |
|                     | <i>M (SD)</i>                                         | 5.93 (4.04) | 3.57 (3.39) | 4.84 (3.93) |        |

485 Note. Time 2 loadings derived using confirmatory factor analysis (CFA) in the combined sample. All correlations were significant at  $p < .001$

486 Table 3. Odds of mental illness and current suicidality controlling for previous diagnosis of depression

|                         | Depressed group,<br><i>n</i> | Moderate mental illness,<br><i>n</i> (%) | Moderate mental illness,<br>AOR [95% CI] | Suicidality,<br><i>n</i> (%) | Suicidality,<br>AOR [95% CI] |
|-------------------------|------------------------------|------------------------------------------|------------------------------------------|------------------------------|------------------------------|
| 18-64                   |                              |                                          |                                          |                              |                              |
| Not depressed           | 189                          | 11 (6)                                   | 1                                        | 13 (7)                       | 1                            |
| Prototypic depression   | 69                           | 54 (78)                                  | 51.35*** [21.94, 120.18]                 | 42 (61)                      | 18.76*** [8.86, 39.72]       |
| Externalised depression | 69                           | 10 (20)                                  | 4.09** [1.60, 10.47]                     | 9 (18)                       | 2.99* [1.19, 7.50]           |
| Mixed depression        | 186                          | 162 (87)                                 | 91.35*** [43.00, 194.06]                 | 136 (73)                     | 31.97*** [16.51, 61.90]      |
| 65+                     |                              |                                          |                                          |                              |                              |
| Not depressed           | 308                          | 5 (2)                                    | 1                                        | 19 (6)                       | 1                            |
| Prototypic depression   | 20                           | 8 (40)                                   | 29.66*** [8.17, 107.670]                 | 8 (40)                       | 8.14*** [2.89, 22.97]        |
| Externalised depression | 41                           | 4 (10)                                   | 5.37* [1.36, 21.26]                      | 10 (24)                      | 4.34*** [1.83, 10.29]        |
| Mixed depression        | 54                           | 36 (67)                                  | 105.05*** [36.48, 302.50]                | 41 (76)                      | 42.69*** [19.47, 93.61]      |

Note. Total *N* = 916 due to 4 respondents not reporting previous depression diagnosis. AOR = adjusted odds ratio. OR for previous depression diagnosis not shown. Moderate mental illness defined as K10  $\geq$  25. Suicidality defined as  $\geq$  1 on PHQ-9 item 9. Not depressed = PHQ-9 < 10 and MDRS-7  $\leq$  5; Prototypic depression = PHQ-9  $\geq$  10 and MDRS-7  $\leq$  5; Externalised depression = PHQ-9 < 10 and MDRS-7 > 5; Mixed depression = PHQ-9  $\geq$  10 and MDRS-7 > 5.

\*\*\**p* < .001, \*\* *p* < .01, \* *p* < .05.



488 Table 4. Odds of being classified as depressed at follow up

| Outcome: Depressed (PHQ-9 $\geq$ 10) at Time 2 ( $n = 328$ ) |         |              |
|--------------------------------------------------------------|---------|--------------|
|                                                              | OR      | 95% CI       |
| Age (older)                                                  | 1.46    | [0.69, 3.09] |
| Previous depression diagnosis (yes)                          | 1.87    | [0.88, 3.99] |
| PHQ-9 (Time 1)                                               | 1.24*** | [1.15, 1.34] |
| Moderate (MDRS-7)                                            | 3.30**  | [1.38, 7.90] |
| Severe (MDRS-7)                                              | 2.00    | [0.76, 5.28] |
| Extremely severe (MDRS-7)                                    | 1.64    | [0.28, 9.54] |

Note. Reference category = low symptoms. \*\*\* $p < .001$ , \*\* $p < .01$ .

489

490

491

492

493

494

495

496

497

498

499

500

501

502

503

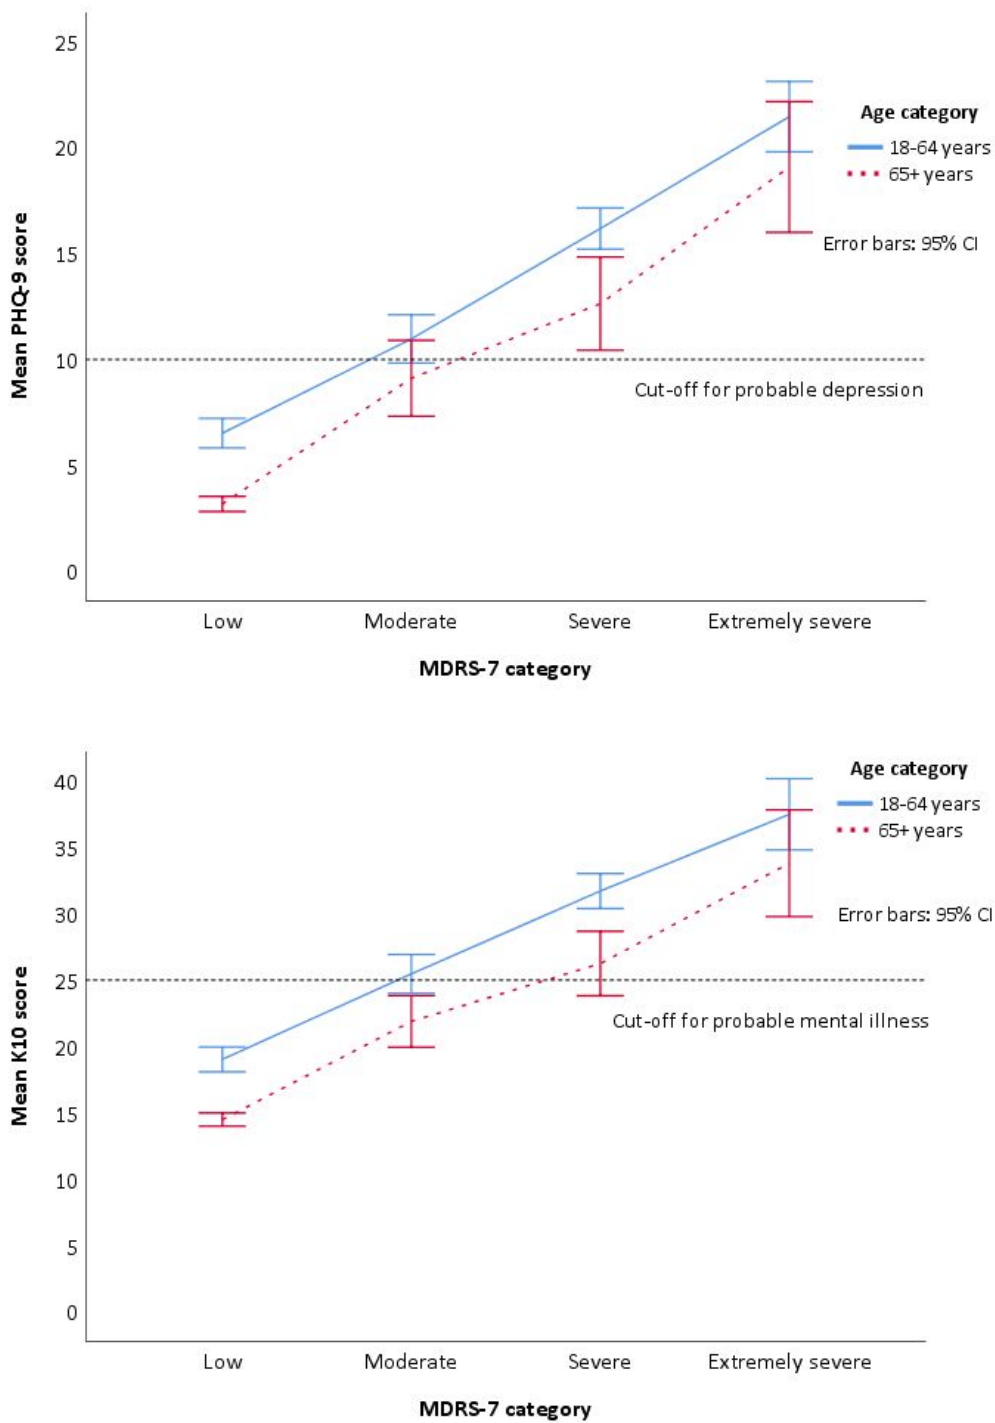

504 Figure 1. Effect of age and MDRS-7 category on prototypic depression symptoms (PHQ-9)  
 505 and psychological distress (K10)

506

507

## References

1. Friedrich, M.J., *Depression is the leading cause of disability around the world*. JAMA, 2017. **317**(15): p. 1517-1517.
2. Costantini, L., et al., *Screening for depression in primary care with Patient Health Questionnaire-9 (PHQ-9): A systematic review*. Journal of Affective Disorders, 2021. **279**: p. 473-483.
3. World Health Organization, *Depression and Other Common Mental Disorders: Global Health Estimates*, W.H. Organization, Editor. 2017, World Health Organization: Geneva.
4. Chesney, E., G.M. Goodwin, and S. Fazel, *Risks of all-cause and suicide mortality in mental disorders: A meta-review*. World Psychiatry, 2014. **13**(2): p. 153-160.
5. Mauvais-Jarvis, F., et al., *Sex and gender: Modifiers of health, disease, and medicine*. The Lancet, 2020. **396**(10250): p. 565-582.
6. World Health Organization, *Preventing suicide: A global imperative*. 2014, World Health Organization: Geneva.
7. American Psychiatric Association, *Diagnostic and statistical manual of mental disorders: DSM-5*. fifth ed. 2013, Arlington, VA: American Psychiatric Association.
8. World Health Organization, *International classification of diseases for mortality and morbidity statistics 2018*.
9. Whittle, E.L., et al., *Men, depression, and coping: Are we on the right path?* Psychology of men & masculinity, 2015. **16**(4): p. 426-438.
10. Cavanagh, A., et al., *Symptom endorsement in men versus women with a diagnosis of depression: A differential item functioning approach*. International Journal of Social Psychiatry, 2016. **62**(6): p. 549-559.
11. Martin, L.A., H.W. Neighbors, and D.M. Griffith, *The experience of symptoms of depression in men vs women: Analysis of the National Comorbidity Survey Replication*. JAMA Psychiatry, 2013. **70**(10): p. 1100-6.
12. Rice, S.M., et al., *Male-type and prototypal depression trajectories for men experiencing mental health problems*. Int J Environ Res Public Health, 2020. **17**(19).
13. Call, J.B. and K. Shafer, *Gendered manifestations of depression and help seeking among men*. American Journal of Men's Health, 2018. **12**(1): p. 41-51.
14. Australian Bureau of Statistics, *Health service usage and health related actions, Australia, 2014-15 (Cat. No. 4364.0.55.002)*. 2017, Australian Bureau of Statistics: Canberra.
15. Australian Institute of Family Studies, *Mental health of Australian males: Depression, suicidality and loneliness*. 2020.
16. Martin, S., et al., *Effect of depression on health service utilisation in men: a prospective cohort study of Australian men aged 35 to 80 years*. BMJ Open, 2021. **11**(3): p. e044893.
17. Wang, Y., et al., *Do men consult less than women? An analysis of routinely collected UK general practice data*. BMJ Open, 2013. **3**(8): p. e003320.
18. Schaffer, A., et al., *Population-based analysis of health care contacts among suicide decedents: identifying opportunities for more targeted suicide prevention strategies*. World Psychiatry, 2016. **15**(2): p. 135-145.
19. Lakkis, N.A. and D.M. Mahmassani, *Screening instruments for depression in primary care: A concise review for clinicians*. Postgraduate Medicine, 2015. **127**(1): p. 99-106.
20. Brownhill, S., et al., *'For men only'. A mental health prompt list in primary care*. Australian family physician, 2003. **32**(6): p. 443.
21. Zierau, F., et al., *The Gotland Male Depression Scale: A validity study in patients with alcohol use disorder*. Nordic Journal of Psychiatry, 2002. **56**(4): p. 265-271.
22. Magovcevic, M. and M. Addis, *The Masculine Depression Scale: Development and psychometric evaluation*. Psychology of Men & Masculinity, 2008. **9**(3): p. 117-132.

- 1  
2  
3 557 23. Rice, S.M., et al., *Development and preliminary validation of the Male Depression Risk Scale: Furthering the assessment of depression in men*. Journal of Affective Disorders, 2013. **151**(3):  
4 558 p. 950-958.  
5 559  
6 560 24. Zajac, I.T., et al., *Suicide risk, psychological distress and treatment preferences in men*  
7 561 *presenting with prototypical, externalising and mixed depressive symptomology*. Journal of  
8 562 Mental Health, 2020: p. 1-8.  
9 563 25. Ferenchick, E.K., P. Ramanuj, and H.A. Pincus, *Depression in primary care: Part 1—screening*  
10 564 *and diagnosis*. BMJ, 2019. **365**: p. 1794.  
11 565 26. Hutton, C. and J. Gunn, *Do longer consultations improve the management of psychological*  
12 566 *problems in general practice? A systematic literature review*. BMC Health Services Research,  
13 567 2007. **7**(1): p. 71.  
14 568 27. The Royal Australian College of General Practitioners, *General Practice: Health of the Nation*  
15 569 *2018*. 2018: East Melbourne, Vic.  
16 570 28. Mitchell, A.J. and J.C. Coyne, *Do ultra-short screening instruments accurately detect*  
17 571 *depression in primary care? A pooled analysis and meta-analysis of 22 studies*. The British  
18 572 journal of general practice : the journal of the Royal College of General Practitioners, 2007.  
19 573 **57**(535): p. 144-151.  
20 574 29. Kroenke, K., R.L. Spitzer, and J.B. Williams, *The PHQ-9: Validity of a brief depression severity*  
21 575 *measure*. Journal of General Internal Medicine, 2001. **16**(9): p. 606-613.  
22 576 30. Kessler, R.C., et al., *Short screening scales to monitor population prevalences and trends in*  
23 577 *non-specific psychological distress*. Psychological Medicine, 2002. **32**(6): p. 959-976.  
24 578 31. Beck, A.T., et al., *Screening for major depression disorders in medical inpatients with the Beck*  
25 579 *Depression Inventory for Primary Care*. Behaviour Research and Therapy, 1997. **35**(8): p. 785-  
26 580 791.  
27 581 32. Rice, S.M., et al., *Externalizing depression symptoms among Canadian males with recent*  
28 582 *suicidal ideation: A focus on young men*. Early Intervention in Psychiatry, 2019. **13**(2): p. 308-  
29 583 313.  
30 584 33. Rice, S.M., et al., *Validity of the Male Depression Risk Scale in a representative Canadian*  
31 585 *sample: sensitivity and specificity in identifying men with recent suicide attempt*. J Ment  
32 586 Health, 2019. **28**(2): p. 132-140.  
33 587 34. Herreen, D., et al., *Associations between conformity to masculine norms and depression: Age*  
34 588 *effects from a population study of Australian men*. BMC Psychology, 2021. **9**(1): p. 32.  
35 589 35. Kroenke, K., et al., *The Patient Health Questionnaire somatic, anxiety, and depressive*  
36 590 *symptom scales: A systematic review*. General Hospital Psychiatry, 2010. **32**(4): p. 345-359.  
37 591 36. Stolk, Y., I. Kaplan, and J. Szwarc, *Clinical use of the Kessler psychological distress scales with*  
38 592 *culturally diverse groups*. International Journal of Methods in Psychiatric Research, 2014.  
39 593 **23**(2): p. 161-183.  
40 594 37. Australian Bureau of Statistics, *National health survey: Users' guide 2014-2015 (Cat. No.*  
41 595 *4363.0)*. 2019, Australian Bureau of Statistics: Canberra.  
42 596 38. JASP Team, *JASP (Version 0.13.1)*. 2020.  
43 597 39. Uddin, M.N. and F.M.A. Islam, *Psychometric evaluation of the modified Kessler seven-item*  
44 598 *version (K7) for measuring psychological distress using Rasch analysis: a cross-sectional study*  
45 599 *in a rural district of Bangladesh*. BMJ open, 2020. **10**(2): p. e034523-e034523.  
46 600 40. Pather, S. and C.S. Uys, *Using scale reduction techniques for improved quality of survey*  
47 601 *information*. South African journal of information management, 2008. **10**(3).  
48 602 41. Stanton, J.M., et al., *Issues and strategies for reducing the length of self-report scales*.  
49 603 *Personnel psychology*, 2002. **55**(1): p. 167-194.

- 1  
2  
3 604 42. Hu, L.t. and P.M. Bentler, *Cutoff criteria for fit indexes in covariance structure analysis: Conventional criteria versus new alternatives*. Structural Equation Modeling: A Multidisciplinary Journal, 1999. **6**(1): p. 1-55.
- 4 605  
5 606  
6 607 43. Australian Bureau of Statistics, *Census of population and housing - Quickstats, community profiles and datapacks user guide, Australia, 2016 (Cat. No. 2916.0)*. 2017, Australian Bureau of Statistics: Canberra.
- 7 608  
8 609  
9 610 44. Addis, M.E., *Gender and depression in men*. Clinical Psychology: Science & Practice, 2008. **15**(3): p. 153-168.
- 10 611  
11 612 45. DeVellis, R.F., *Scale development: Theory and applications*. 4th ed. Applied social research methods series. Vol. 26. 2016, Thousand Oaks, Calif: Sage Publications.
- 12 613  
13 614 46. Coleman, D., *Traditional masculinity as a risk factor for suicidal ideation: Cross-sectional and prospective evidence from a study of young adults*. Archives of Suicide Research, 2015. **19**(3): p. 366-384.
- 14 615  
15 616  
16 617 47. Macdonald, J.A., et al., *Profiles of Depressive Symptoms and Anger in Men: Associations With Postpartum Family Functioning*. Frontiers in psychiatry, 2020. **11**: p. 578114-578114.
- 17 618  
18 619 48. Cavanagh, A., et al., *Differences in the expression of symptoms in men versus women with depression: A systematic review and meta-analysis*. Harvard Review of Psychiatry, 2017. **25**(1): p. 29-38.
- 19 620  
20 621  
21 622 49. Kendler, K.S. and C.O. Gardner, *Sex differences in the pathways to major depression: a study of opposite-sex twin pairs*. Am J Psychiatry, 2014. **171**(4): p. 426-35.
- 22 623  
23 624 50. Hetrick, S.E., et al., *Early identification and intervention in depressive disorders: Towards a clinical staging model*. Psychotherapy and Psychosomatics, 2008. **77**(5): p. 263-270.
- 24 625  
25 626 51. Rice, S.M., et al., *Longitudinal sex differences of externalising and internalising depression symptom trajectories: Implications for assessment of depression in men from an online study*. International Journal of Social Psychiatry, 2015. **61**(3): p. 236-240.
- 26 627  
27 628  
28 629 52. Wilson, S. and C.E. Durbin, *Effects of paternal depression on fathers' parenting behaviors: A meta-analytic review*. Clinical Psychology Review, 2010. **30**(2): p. 167-180.
- 29 630  
30 631 53. Choi, I., et al., *Using different Facebook advertisements to recruit men for an online mental health study: Engagement and selection bias*. Internet Interventions, 2017. **8**: p. 27-34.
- 31 632  
32 633  
33 634  
34 635  
35 636  
36 637  
37 638  
38 639  
39 640  
40 641  
41 642  
42  
43  
44  
45  
46  
47  
48  
49  
50  
51  
52  
53  
54  
55  
56  
57  
58  
59  
60

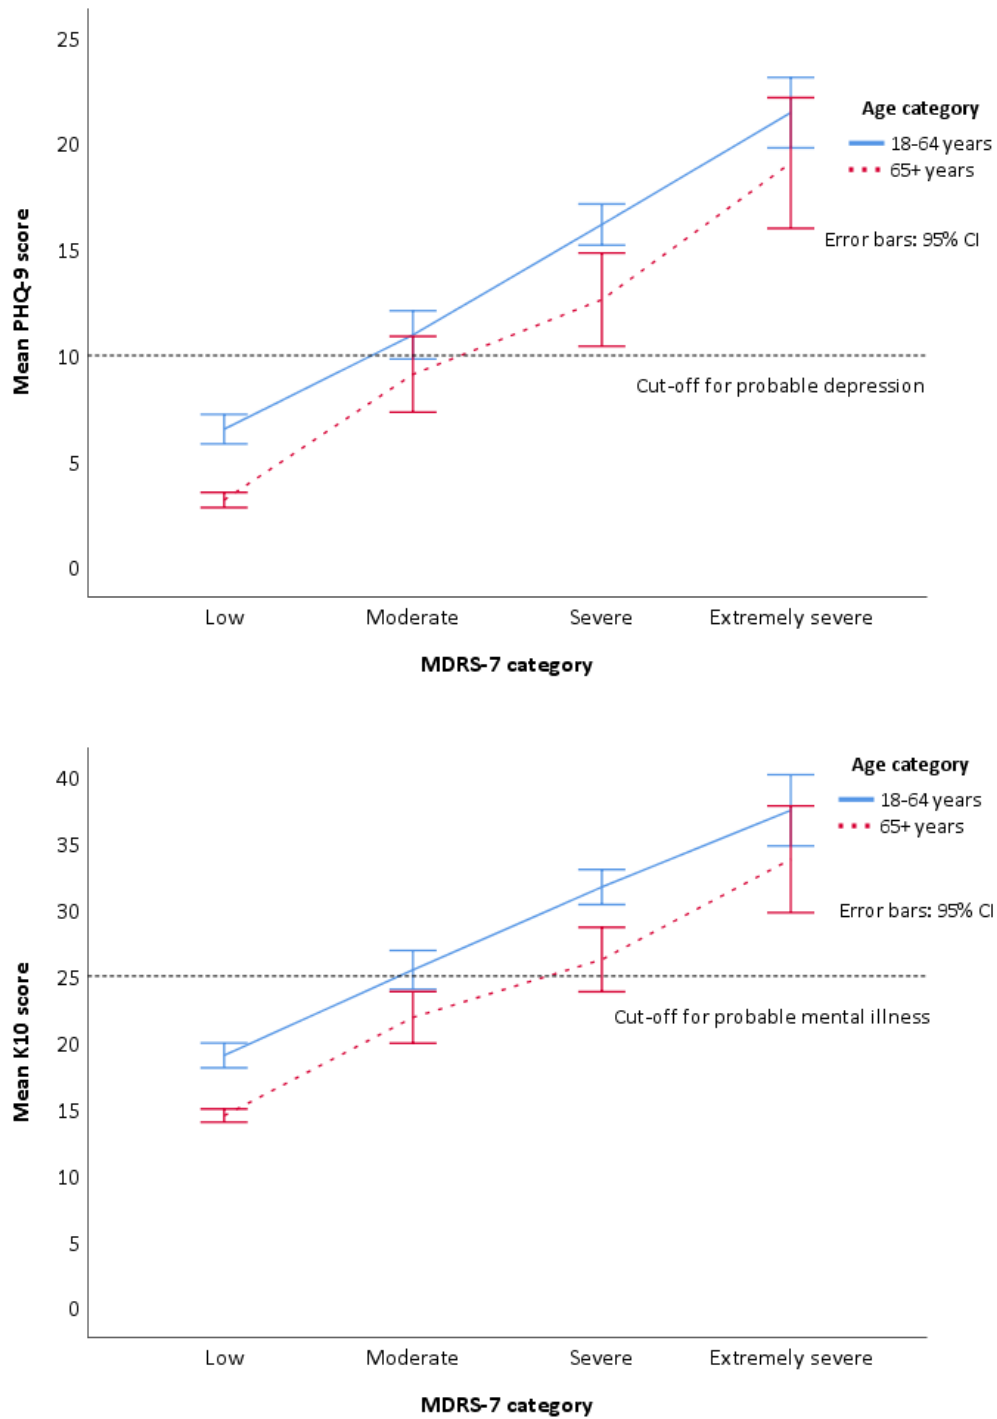

Figure 1. Effect of age and MDRS-7 category on prototypic depression symptoms (PHQ-9) and psychological distress (K10)

Supplementary Table 1. Descriptive and relational statistics for MDRS-22 items across younger and older age groups

| Domain              | Item                                                   | Younger males |           |       |                   |                    |                           |                         | Older males |           |       |                   |                    |                           |            |
|---------------------|--------------------------------------------------------|---------------|-----------|-------|-------------------|--------------------|---------------------------|-------------------------|-------------|-----------|-------|-------------------|--------------------|---------------------------|------------|
|                     |                                                        | <i>M</i>      | <i>SD</i> | Skew  | Total( <i>r</i> ) | Domain( <i>r</i> ) | Other domains( <i>r</i> ) | Item score <sup>a</sup> | <i>M</i>    | <i>SD</i> | Skew  | Total( <i>r</i> ) | Domain( <i>r</i> ) | Other domains( <i>r</i> ) | Item score |
| Emotion Suppression | I tried to ignore feeling down                         | 1.77          | 1.12      | 0.08  | .62               | .77                | .46                       | 1                       | 1.34        | 1.26      | 0.51  | .57               | .77                | .35                       | 0          |
|                     | I bottled up my negative feelings                      | 1.93          | 1.16      | 0.01  | .64               | .86                | .45                       | 3                       | 1.28        | 1.15      | 0.58  | .73               | .86                | .52                       | 3          |
|                     | I covered up my difficulties                           | 1.90          | 1.18      | -0.04 | .64               | .85                | .45                       | 2                       | 1.21        | 1.21      | 0.63  | .72               | .84                | .51                       | 0          |
|                     | I had to work things out by myself                     | 2.38          | 1.18      | -0.31 | .46               | .68                | .29                       | 2                       | 1.95        | 1.36      | -0.04 | .58               | .72                | .39                       | 3          |
| Alcohol Use         | I drank more alcohol than usual                        | 0.80          | 1.09      | 1.24  | .60               | .89                | .34                       | 2                       | 0.47        | 0.89      | 2.11  | .59               | .91                | .33                       | 0          |
|                     | I stopped feeling so bad while drinking                | 0.80          | 1.14      | 1.22  | .57               | .86                | .32                       | 0                       | 0.38        | 0.92      | 2.51  | .58               | .88                | .33                       | 0          |
|                     | I needed alcohol to help me unwind                     | 0.92          | 1.16      | 1.10  | .60               | .94                | .32                       | 5                       | 0.52        | 0.94      | 2.02  | .61               | .94                | .34                       | 6          |
|                     | I needed to have easy access to alcohol                | 0.53          | 0.98      | 1.93  | .58               | .87                | .34                       | 1                       | 0.44        | 0.91      | 2.17  | .59               | .91                | .33                       | 0          |
| Somatic Symptoms    | I had more heartburn than usual                        | 0.60          | 0.91      | 1.48  | .39               | .65                | .26                       | 0                       | 0.38        | 0.71      | 1.87  | .50               | .70                | .38                       | 0          |
|                     | I had regular headaches                                | 0.89          | 1.04      | 1.07  | .49               | .74                | .35                       | 0                       | 0.41        | 0.79      | 2.23  | .54               | .77                | .42                       | 0          |
|                     | I had stomach pains                                    | 0.72          | 0.90      | 1.06  | .53               | .74                | .40                       | 2                       | 0.38        | 0.76      | 2.33  | .57               | .77                | .45                       | 2          |
|                     | I had unexplained aches and pains                      | 1.05          | 1.13      | 0.80  | .52               | .78                | .37                       | 4                       | 0.74        | 0.93      | 1.19  | .57               | .78                | .44                       | 5          |
| Anger & Aggression  | I overreacted to situations with aggressive behaviour  | 0.59          | 0.83      | 1.41  | .52               | .83                | .38                       | 2                       | 0.41        | 0.70      | 1.80  | .56               | .85                | .45                       | 4          |
|                     | I verbally lashed out at others without being provoked | 0.28          | 0.61      | 2.54  | .42               | .77                | .28                       | 0                       | 0.15        | 0.45      | 3.44  | .45               | .75                | .34                       | 0          |
|                     | I was verbally aggressive to others                    | 0.34          | 0.65      | 2.13  | .46               | .83                | .31                       | 0                       | 0.20        | 0.49      | 2.85  | .41               | .80                | .28                       | 0          |
|                     | It was difficult to manage my anger                    | 0.58          | 0.84      | 1.48  | .56               | .84                | .42                       | 4                       | 0.31        | 0.64      | 2.35  | .58               | .81                | .47                       | 2          |
| Drug Use            | I sought out drugs                                     | 0.32          | 0.79      | 2.64  | .47               | .94                | .30                       | 3                       | 0.11        | 0.43      | 4.82  | .33               | .90                | .23                       | 4          |
|                     | I used drugs to cope                                   | 0.32          | 0.81      | 2.79  | .47               | .94                | .30                       | 2                       | 0.07        | 0.36      | 5.55  | .31               | .83                | .23                       | 0          |
|                     | Using drugs provided temporary relief                  | 0.33          | 0.84      | 2.73  | .47               | .95                | .29                       | 4                       | 0.10        | 0.43      | 4.89  | .40               | .90                | .31                       | 4          |
| Risk-Taking         | I drove dangerously or aggressively                    | 0.33          | 0.66      | 2.04  | .33               | .67                | .24                       | 0                       | 0.12        | 0.37      | 3.14  | .32               | .60                | .27                       | 1          |
|                     | I stopped caring about the consequences of my actions  | 0.54          | 0.87      | 1.69  | .55               | .82                | .46                       | 4                       | 0.21        | 0.59      | 3.26  | .54               | .83                | .47                       | 5          |
|                     | I took unnecessary risks                               | 0.39          | 0.70      | 1.93  | .56               | .84                | .46                       | 3                       | 0.15        | 0.46      | 3.21  | .47               | .82                | .40                       | 0          |

<sup>a</sup> Items received a score of 0 or 1 (which was summed) for each statistic within its corresponding domain as follows: highest mean; largest *SD*; skew closest to zero; strongest correlation with total score; strongest correlation with domain score; and strongest correlation with other domains.

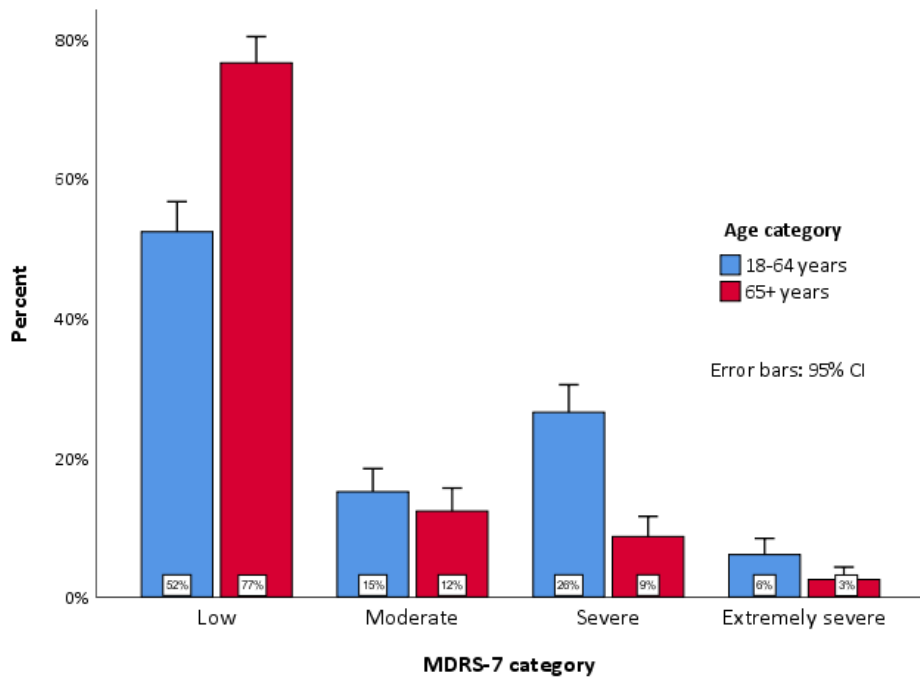

Supplementary Figure 1. Proportion of participants within MDRS-7 categories

Note. Low (0 – 5), Moderate (6 – 7), Severe (8 – 12), Extremely severe (13+).



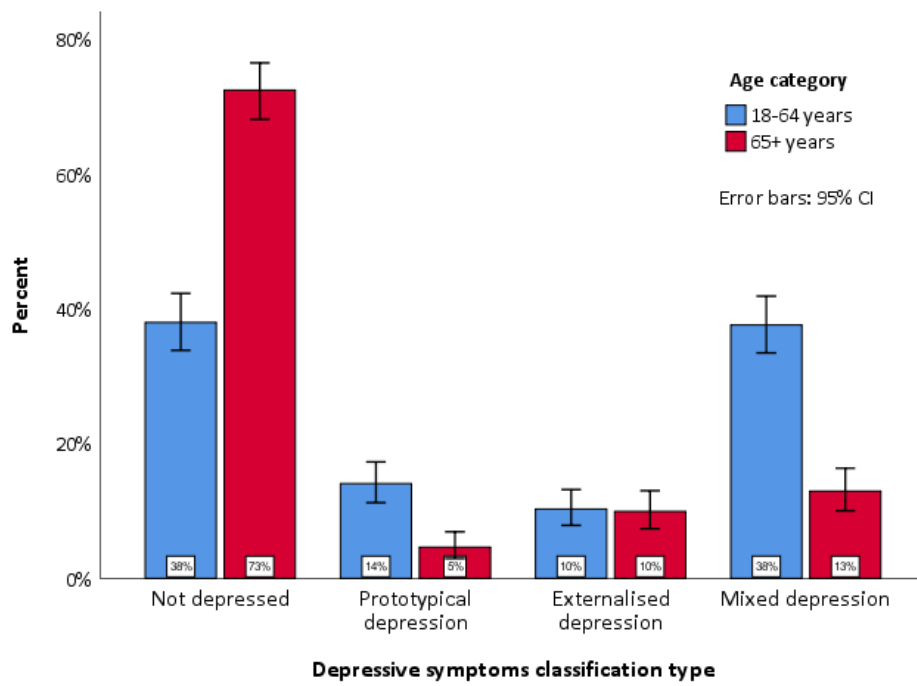

Supplementary Figure 2. Proportion of participants according to depressive symptoms classification type

# Reporting checklist for cross sectional study.

Based on the STROBE cross sectional guidelines.

## Instructions to authors

Complete this checklist by entering the page numbers from your manuscript where readers will find each of the items listed below.

Your article may not currently address all the items on the checklist. Please modify your text to include the missing information. If you are certain that an item does not apply, please write "n/a" and provide a short explanation.

Upload your completed checklist as an extra file when you submit to a journal.

In your methods section, say that you used the STROBE cross sectional reporting guidelines, and cite them as:

von Elm E, Altman DG, Egger M, Pocock SJ, Gotsche PC, Vandembroucke JP. The Strengthening the Reporting of Observational Studies in Epidemiology (STROBE) Statement: guidelines for reporting observational studies.

|                           | Reporting Item                                                                                                      | Page Number |
|---------------------------|---------------------------------------------------------------------------------------------------------------------|-------------|
| <b>Title and abstract</b> |                                                                                                                     |             |
| Title                     | <a href="#">#1a</a> Indicate the study's design with a commonly used term in the title or the abstract              | 1           |
| Abstract                  | <a href="#">#1b</a> Provide in the abstract an informative and balanced summary of what was done and what was found | 2           |
| <b>Introduction</b>       |                                                                                                                     |             |
| Background / rationale    | <a href="#">#2</a> Explain the scientific background and rationale for the investigation being reported             | 4-6         |
| Objectives                | <a href="#">#3</a> State specific objectives, including any prespecified hypotheses                                 | 6           |
| <b>Methods</b>            |                                                                                                                     |             |

|    |                      |                      |                                                            |     |
|----|----------------------|----------------------|------------------------------------------------------------|-----|
| 1  | Study design         | <a href="#">#4</a>   | Present key elements of study design early in the paper    | 6   |
| 2  |                      |                      |                                                            |     |
| 3  | Setting              | <a href="#">#5</a>   | Describe the setting, locations, and relevant dates,       | 6   |
| 4  |                      |                      | including periods of recruitment, exposure, follow-up,     |     |
| 5  |                      |                      | and data collection                                        |     |
| 6  |                      |                      |                                                            |     |
| 7  |                      |                      |                                                            |     |
| 8  |                      |                      |                                                            |     |
| 9  | Eligibility criteria | <a href="#">#6a</a>  | Give the eligibility criteria, and the sources and methods | 6   |
| 10 |                      |                      | of selection of participants.                              |     |
| 11 |                      |                      |                                                            |     |
| 12 |                      |                      |                                                            |     |
| 13 |                      | <a href="#">#7</a>   | Clearly define all outcomes, exposures, predictors,        | 6-9 |
| 14 |                      |                      | potential confounders, and effect modifiers. Give          |     |
| 15 |                      |                      | diagnostic criteria, if applicable                         |     |
| 16 |                      |                      |                                                            |     |
| 17 |                      |                      |                                                            |     |
| 18 | Data sources /       | <a href="#">#8</a>   | For each variable of interest give sources of data and     | 6-9 |
| 19 | measurement          |                      | details of methods of assessment (measurement).            |     |
| 20 |                      |                      | Describe comparability of assessment methods if there      |     |
| 21 |                      |                      | is more than one group. Give information separately for    |     |
| 22 |                      |                      | for exposed and unexposed groups if applicable.            |     |
| 23 |                      |                      |                                                            |     |
| 24 |                      |                      |                                                            |     |
| 25 |                      |                      |                                                            |     |
| 26 |                      |                      |                                                            |     |
| 27 | Bias                 | <a href="#">#9</a>   | Describe any efforts to address potential sources of       | 6   |
| 28 |                      |                      | bias                                                       |     |
| 29 |                      |                      |                                                            |     |
| 30 |                      |                      |                                                            |     |
| 31 | Study size           | <a href="#">#10</a>  | Explain how the study size was arrived at                  | 8-9 |
| 32 |                      |                      |                                                            |     |
| 33 | Quantitative         | <a href="#">#11</a>  | Explain how quantitative variables were handled in the     | 8-9 |
| 34 | variables            |                      | analyses. If applicable, describe which groupings were     |     |
| 35 |                      |                      | chosen, and why                                            |     |
| 36 |                      |                      |                                                            |     |
| 37 |                      |                      |                                                            |     |
| 38 |                      |                      |                                                            |     |
| 39 | Statistical          | <a href="#">#12a</a> | Describe all statistical methods, including those used to  | 8-9 |
| 40 | methods              |                      | control for confounding                                    |     |
| 41 |                      |                      |                                                            |     |
| 42 |                      |                      |                                                            |     |
| 43 | Statistical          | <a href="#">#12b</a> | Describe any methods used to examine subgroups and         | 8-9 |
| 44 | methods              |                      | interactions                                               |     |
| 45 |                      |                      |                                                            |     |
| 46 |                      |                      |                                                            |     |
| 47 | Statistical          | <a href="#">#12c</a> | Explain how missing data were addressed                    | 8-9 |
| 48 | methods              |                      |                                                            |     |
| 49 |                      |                      |                                                            |     |
| 50 |                      |                      |                                                            |     |
| 51 | Statistical          | <a href="#">#12d</a> | If applicable, describe analytical methods taking          | N/A |
| 52 | methods              |                      | account of sampling strategy                               |     |
| 53 |                      |                      |                                                            |     |
| 54 |                      |                      |                                                            |     |
| 55 | Statistical          | <a href="#">#12e</a> | Describe any sensitivity analyses                          | N/A |
| 56 | methods              |                      |                                                            |     |
| 57 |                      |                      |                                                            |     |
| 58 |                      |                      |                                                            |     |
| 59 |                      |                      |                                                            |     |
| 60 |                      |                      |                                                            |     |

## Results

|    |                  |                      |                                                                        |
|----|------------------|----------------------|------------------------------------------------------------------------|
| 1  |                  |                      |                                                                        |
| 2  |                  |                      |                                                                        |
| 3  |                  |                      |                                                                        |
| 4  | Participants     | <a href="#">#13a</a> | Report numbers of individuals at each stage of study— 8-9              |
| 5  |                  |                      | eg numbers potentially eligible, examined for eligibility,             |
| 6  |                  |                      | confirmed eligible, included in the study, completing                  |
| 7  |                  |                      | follow-up, and analysed. Give information separately for               |
| 8  |                  |                      | for exposed and unexposed groups if applicable.                        |
| 9  |                  |                      |                                                                        |
| 10 |                  |                      |                                                                        |
| 11 |                  |                      |                                                                        |
| 12 | Participants     | <a href="#">#13b</a> | Give reasons for non-participation at each stage N/A                   |
| 13 |                  |                      |                                                                        |
| 14 | Participants     | <a href="#">#13c</a> | Consider use of a flow diagram N/A                                     |
| 15 |                  |                      |                                                                        |
| 16 |                  |                      |                                                                        |
| 17 | Descriptive data | <a href="#">#14a</a> | Give characteristics of study participants (eg 9-10                    |
| 18 |                  |                      | demographic, clinical, social) and information on                      |
| 19 |                  |                      | exposures and potential confounders. Give information                  |
| 20 |                  |                      | separately for exposed and unexposed groups if                         |
| 21 |                  |                      | applicable.                                                            |
| 22 |                  |                      |                                                                        |
| 23 |                  |                      |                                                                        |
| 24 |                  |                      |                                                                        |
| 25 | Descriptive data | <a href="#">#14b</a> | Indicate number of participants with missing data for 8-9              |
| 26 |                  |                      | each variable of interest                                              |
| 27 |                  |                      |                                                                        |
| 28 |                  |                      |                                                                        |
| 29 | Outcome data     | <a href="#">#15</a>  | Report numbers of outcome events or summary N/A                        |
| 30 |                  |                      | measures. Give information separately for exposed and                  |
| 31 |                  |                      | unexposed groups if applicable.                                        |
| 32 |                  |                      |                                                                        |
| 33 |                  |                      |                                                                        |
| 34 |                  |                      |                                                                        |
| 35 | Main results     | <a href="#">#16a</a> | Give unadjusted estimates and, if applicable, All estimates            |
| 36 |                  |                      | confounder-adjusted estimates and their precision (eg, are reported in |
| 37 |                  |                      | 95% confidence interval). Make clear which Tables                      |
| 38 |                  |                      | confounders were adjusted for and why they were                        |
| 39 |                  |                      | included all estimates are reported in tables                          |
| 40 |                  |                      |                                                                        |
| 41 |                  |                      |                                                                        |
| 42 |                  |                      |                                                                        |
| 43 | Main results     | <a href="#">#16b</a> | Report category boundaries when continuous variables 8-9               |
| 44 |                  |                      | were categorized                                                       |
| 45 |                  |                      |                                                                        |
| 46 |                  |                      |                                                                        |
| 47 | Main results     | <a href="#">#16c</a> | If relevant, consider translating estimates of relative risk N/A       |
| 48 |                  |                      | into absolute risk for a meaningful time period                        |
| 49 |                  |                      |                                                                        |
| 50 |                  |                      |                                                                        |
| 51 | Other analyses   | <a href="#">#17</a>  | Report other analyses done—e.g., analyses of N/A                       |
| 52 |                  |                      | subgroups and interactions, and sensitivity analyses                   |
| 53 |                  |                      |                                                                        |
| 54 |                  |                      |                                                                        |

## Discussion

|    |                    |                     |                                                                                                                                                                  |       |
|----|--------------------|---------------------|------------------------------------------------------------------------------------------------------------------------------------------------------------------|-------|
| 1  | Key results        | <a href="#">#18</a> | Summarise key results with reference to study objectives                                                                                                         | 12-15 |
| 2  |                    |                     |                                                                                                                                                                  |       |
| 3  |                    |                     |                                                                                                                                                                  |       |
| 4  |                    |                     |                                                                                                                                                                  |       |
| 5  | Limitations        | <a href="#">#19</a> | Discuss limitations of the study, taking into account sources of potential bias or imprecision. Discuss both direction and magnitude of any potential bias.      | 14    |
| 6  |                    |                     |                                                                                                                                                                  |       |
| 7  |                    |                     |                                                                                                                                                                  |       |
| 8  |                    |                     |                                                                                                                                                                  |       |
| 9  |                    |                     |                                                                                                                                                                  |       |
| 10 | Interpretation     | <a href="#">#20</a> | Give a cautious overall interpretation considering objectives, limitations, multiplicity of analyses, results from similar studies, and other relevant evidence. | 12-15 |
| 11 |                    |                     |                                                                                                                                                                  |       |
| 12 |                    |                     |                                                                                                                                                                  |       |
| 13 |                    |                     |                                                                                                                                                                  |       |
| 14 |                    |                     |                                                                                                                                                                  |       |
| 15 |                    |                     |                                                                                                                                                                  |       |
| 16 | Generalisability   | <a href="#">#21</a> | Discuss the generalisability (external validity) of the study results                                                                                            | 14    |
| 17 |                    |                     |                                                                                                                                                                  |       |
| 18 |                    |                     |                                                                                                                                                                  |       |
| 19 |                    |                     |                                                                                                                                                                  |       |
| 20 | <b>Other</b>       |                     |                                                                                                                                                                  |       |
| 21 | <b>Information</b> |                     |                                                                                                                                                                  |       |
| 22 |                    |                     |                                                                                                                                                                  |       |
| 23 |                    |                     |                                                                                                                                                                  |       |
| 24 | Funding            | <a href="#">#22</a> | Give the source of funding and the role of the funders for the present study and, if applicable, for the original study on which the present article is based    | N/A   |
| 25 |                    |                     |                                                                                                                                                                  |       |
| 26 |                    |                     |                                                                                                                                                                  |       |
| 27 |                    |                     |                                                                                                                                                                  |       |
| 28 |                    |                     |                                                                                                                                                                  |       |

29 None The STROBE checklist is distributed under the terms of the Creative Commons Attribution  
 30 License CC-BY. This checklist can be completed online using <https://www.goodreports.org/>, a tool  
 31 made by the [EQUATOR Network](#) in collaboration with [Penelope.ai](#)  
 32  
 33  
 34  
 35  
 36  
 37  
 38  
 39  
 40  
 41  
 42  
 43  
 44  
 45  
 46  
 47  
 48  
 49  
 50  
 51  
 52  
 53  
 54  
 55  
 56  
 57  
 58  
 59  
 60
