# Supplementary material for: Brief assessment of male depression in clinical care: Validation of the Male Depression Risk Scale short form in a cross-sectional study of Australian men
Source: PubMed Central journal article supplement — BMJ Open. 2022 Mar 28;12(3):e053650. doi: 10.1136/bmjopen-2021-053650 (PMC8961138; doi:10.1136/bmjopen-2021-053650), 2022-03-28
Supplement: bmjopen-2021-053650supp001.pdf [file bmjopen-2021-053650supp001.pdf]

Supplementary Table 1. Descriptive and relational statistics for MIDRS-22 items across younger and older age groups

| Domain              | Item                                                   | Younger males |      |       |          |           |                  |                         | Older males |      |       |          |           |                  |            |
|---------------------|--------------------------------------------------------|---------------|------|-------|----------|-----------|------------------|-------------------------|-------------|------|-------|----------|-----------|------------------|------------|
|                     |                                                        | M             | SD   | Skew  | Total(r) | Domain(r) | Other domains(r) | Item score <sup>a</sup> | M           | SD   | Skew  | Total(r) | Domain(r) | Other domains(r) | Item score |
| Emotion Suppression | I tried to ignore feeling down                         | 1.77          | 1.12 | 0.08  | .62      | .77       | .46              | 1                       | 1.34        | 1.26 | 0.51  | .57      | .77       | .35              | 0          |
|                     | I bottled up my negative feelings                      | 1.93          | 1.16 | 0.01  | .64      | .86       | .45              | 3                       | 1.28        | 1.15 | 0.58  | .73      | .86       | .52              | 3          |
|                     | I covered up my difficulties                           | 1.90          | 1.18 | -0.04 | .64      | .85       | .45              | 2                       | 1.21        | 1.21 | 0.63  | .72      | .84       | .51              | 0          |
|                     | I had to work things out by myself                     | 2.38          | 1.18 | -0.31 | .46      | .68       | .29              | 2                       | 1.95        | 1.36 | -0.04 | .58      | .72       | .39              | 3          |
| Alcohol Use         | I drank more alcohol than usual                        | 0.80          | 1.09 | 1.24  | .60      | .89       | .34              | 2                       | 0.47        | 0.89 | 2.11  | .59      | .91       | .33              | 0          |
|                     | I stopped feeling so bad while drinking                | 0.80          | 1.14 | 1.22  | .57      | .86       | .32              | 0                       | 0.38        | 0.92 | 2.51  | .58      | .88       | .33              | 0          |
|                     | I needed alcohol to help me unwind                     | 0.92          | 1.16 | 1.10  | .60      | .94       | .32              | 5                       | 0.52        | 0.94 | 2.02  | .61      | .94       | .34              | 6          |
|                     | I needed to have easy access to alcohol                | 0.53          | 0.98 | 1.93  | .58      | .87       | .34              | 1                       | 0.44        | 0.91 | 2.17  | .59      | .91       | .33              | 0          |
| Somatic Symptoms    | I had more heartburn than usual                        | 0.60          | 0.91 | 1.48  | .39      | .65       | .26              | 0                       | 0.38        | 0.71 | 1.87  | .50      | .70       | .38              | 0          |
|                     | I had regular headaches                                | 0.89          | 1.04 | 1.07  | .49      | .74       | .35              | 0                       | 0.41        | 0.79 | 2.23  | .54      | .77       | .42              | 0          |
|                     | I had stomach pains                                    | 0.72          | 0.90 | 1.06  | .53      | .74       | .40              | 2                       | 0.38        | 0.76 | 2.33  | .57      | .77       | .45              | 2          |
|                     | I had unexplained aches and pains                      | 1.05          | 1.13 | 0.80  | .52      | .78       | .37              | 4                       | 0.74        | 0.93 | 1.19  | .57      | .78       | .44              | 5          |
| Anger & Aggression  | I overreacted to situations with aggressive behaviour  | 0.59          | 0.83 | 1.41  | .52      | .83       | .38              | 2                       | 0.41        | 0.70 | 1.80  | .56      | .85       | .45              | 4          |
|                     | I verbally lashed out at others without being provoked | 0.28          | 0.61 | 2.54  | .42      | .77       | .28              | 0                       | 0.15        | 0.45 | 3.44  | .45      | .75       | .34              | 0          |
|                     | I was verbally aggressive to others                    | 0.34          | 0.65 | 2.13  | .46      | .83       | .31              | 0                       | 0.20        | 0.49 | 2.85  | .41      | .80       | .28              | 0          |
|                     | It was difficult to manage my anger                    | 0.58          | 0.84 | 1.48  | .56      | .84       | .42              | 4                       | 0.31        | 0.64 | 2.35  | .58      | .81       | .47              | 2          |
| Drug Use            | I sought out drugs                                     | 0.32          | 0.79 | 2.64  | .47      | .94       | .30              | 3                       | 0.11        | 0.43 | 4.82  | .33      | .90       | .23              | 4          |
|                     | I used drugs to cope                                   | 0.32          | 0.81 | 2.79  | .47      | .94       | .30              | 2                       | 0.07        | 0.36 | 5.55  | .31      | .83       | .23              | 0          |
|                     | Using drugs provided temporary relief                  | 0.33          | 0.84 | 2.73  | .47      | .95       | .29              | 4                       | 0.10        | 0.43 | 4.89  | .40      | .90       | .31              | 4          |
| Risk-Taking         | I drove dangerously or aggressively                    | 0.33          | 0.66 | 2.04  | .33      | .67       | .24              | 0                       | 0.12        | 0.37 | 3.14  | .32      | .60       | .27              | 1          |
|                     | I stopped caring about the consequences of my actions  | 0.54          | 0.87 | 1.69  | .55      | .82       | .46              | 4                       | 0.21        | 0.59 | 3.26  | .54      | .83       | .47              | 5          |
|                     | I took unnecessary risks                               | 0.39          | 0.70 | 1.93  | .56      | .84       | .46              | 3                       | 0.15        | 0.46 | 3.21  | .47      | .82       | .40              | 0          |

<sup>a</sup> Items received a score of 0 or 1 (which was summed) for each statistic within its corresponding domain as follows: highest mean; largest SD; skew closest to zero; strongest correlation with total score; strongest correlation with domain score; and strongest correlation with other domains.

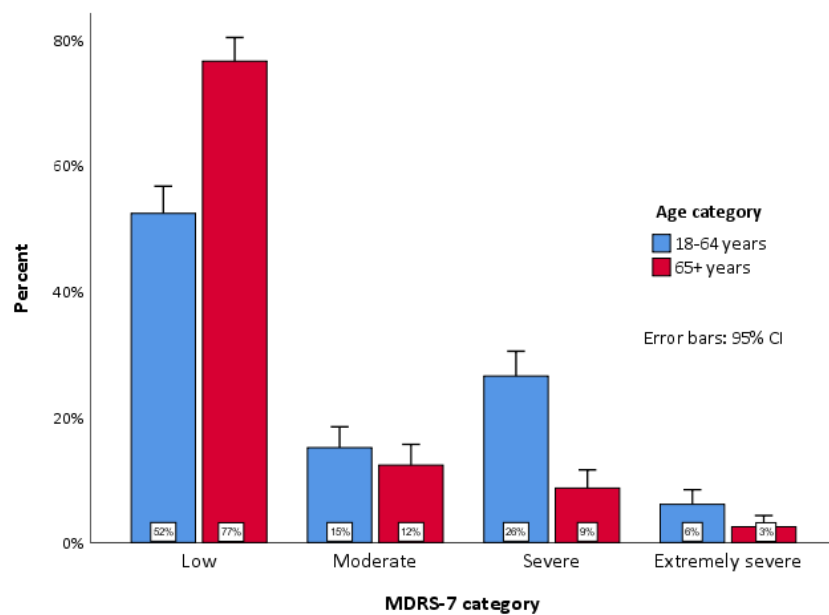

Supplementary Figure 1. Proportion of participants within MDRS-7 categories

Note. Low (0 – 5), Moderate (6 – 7), Severe (8 – 12), Extremely severe (13+).

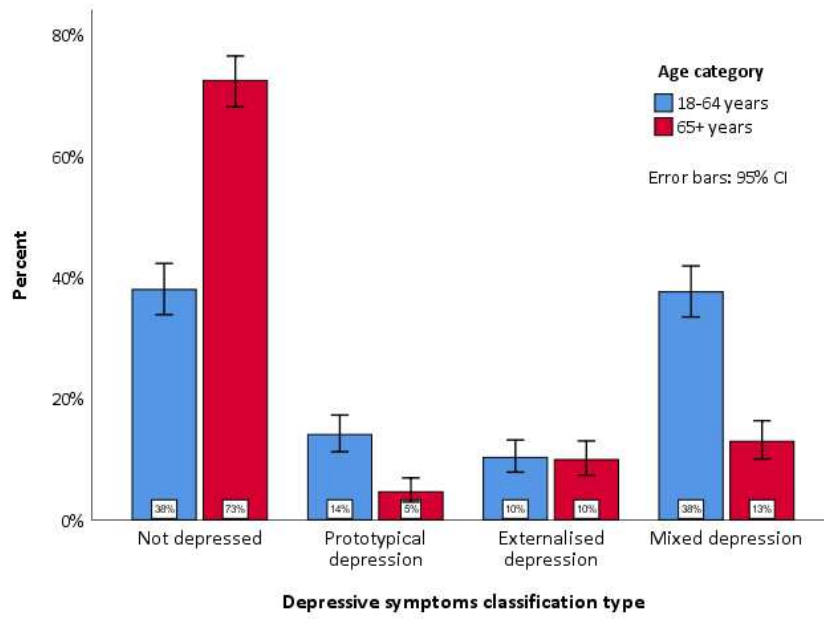

Supplementary Figure 2. Proportion of participants according to depressive symptoms classification type
