# Supplementary material for: Brief assessment of male depression in clinical care: Validation of the Male Depression Risk Scale short form in a cross-sectional study of Australian men
Source: PubMed Central journal article supplement — BMJ Open. 2022 Mar 28;12(3):e053650. doi: 10.1136/bmjopen-2021-053650 (PMC8961138; doi:10.1136/bmjopen-2021-053650), 2022-03-28
Supplement: bmjopen-2021-053650supp002.pdf [file bmjopen-2021-053650supp002.pdf]

### Male Depression Risk Scale (MDRS-7)

**Instructions for completion:** Please think back over the last four weeks and respond to each item considering how often it applied to you. Please respond where 0 = none of the time; 4 = all of the time.

|                                                          | None of the time | A little of the time | Some of the time | Most of the time | All of the time |
|----------------------------------------------------------|------------------|----------------------|------------------|------------------|-----------------|
| 1. I bottled up my negative feelings                     | 0                | 1                    | 2                | 3                | 4               |
| 2. I needed alcohol to help me unwind                    | 0                | 1                    | 2                | 3                | 4               |
| 3. I had unexplained aches and pains                     | 0                | 1                    | 2                | 3                | 4               |
| 4. I overreacted to situations with aggressive behaviour | 0                | 1                    | 2                | 3                | 4               |
| 5. It was difficult to manage my anger                   | 0                | 1                    | 2                | 3                | 4               |
| 6. Using drugs provided temporary relief                 | 0                | 1                    | 2                | 3                | 4               |
| 7. I stopped caring about the consequences of my actions | 0                | 1                    | 2                | 3                | 4               |

**Scoring:** The MDRS-7 provides a Total Score (sum of all 7 items):

| MDRS-7 Range            | MDRS-7 Cutoff Scores |
|-------------------------|----------------------|
| <i>Low</i>              | 0 – 5                |
| <i>Moderate</i>         | 6 – 7                |
| <i>Severe</i>           | 8 – 12               |
| <i>Extremely Severe</i> | 13+                  |
